RESEARCH ARTICLE

# Drosophila Casein Kinase I Alpha Regulates Homolog Pairing and Genome Organization by Modulating Condensin II Subunit Cap-H2 Levels

Huy Q. Nguyen<sup>1</sup>, Jonathan Nye<sup>2</sup>, Daniel W. Buster<sup>2</sup>, Joseph E. Klebba<sup>2</sup>, Gregory C. Rogers<sup>2\*</sup>, Giovanni Bosco<sup>1\*</sup>

**1** Geisel School of Medicine at Dartmouth, Hanover, New Hampshire, United States of America, **2** Department of Cellular and Molecular Medicine, University of Arizona Cancer Center, University of Arizona, Tucson, Arizona, United States of America

\* [Giovanni.Bosco@dartmouth.edu](mailto:Giovanni.Bosco@dartmouth.edu) (GB); [gcrogers@email.arizona.edu](mailto:gcrogers@email.arizona.edu) (GCR)

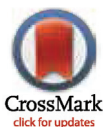

click for updates

 OPEN ACCESS

**Citation:** Nguyen HQ, Nye J, Buster DW, Klebba JE, Rogers GC, Bosco G (2015) Drosophila Casein Kinase I Alpha Regulates Homolog Pairing and Genome Organization by Modulating Condensin II Subunit Cap-H2 Levels. *PLoS Genet* 11(2): e1005014. doi:10.1371/journal.pgen.1005014

**Editor:** R. Scott Hawley, Stowers Institute for Medical Research, UNITED STATES

**Received:** March 25, 2014

**Accepted:** January 20, 2015

**Published:** February 27, 2015

**Copyright:** © 2015 Nguyen et al. This is an open access article distributed under the terms of the [Creative Commons Attribution License](https://creativecommons.org/licenses/by/4.0/), which permits unrestricted use, distribution, and reproduction in any medium, provided the original author and source are credited.

**Data Availability Statement:** All relevant data are within the paper and its Supporting Information files.

**Funding:** This work was supported by NIH R01 GM069462 grant to GB. The funders had no role in study design, data collection and analysis, decision to publish, or preparation of the manuscript.

**Competing Interests:** The authors have declared that no competing interests exist.

## Abstract

The spatial organization of chromosomes within interphase nuclei is important for gene expression and epigenetic inheritance. Although the extent of physical interaction between chromosomes and their degree of compaction varies during development and between different cell-types, it is unclear how regulation of chromosome interactions and compaction relate to spatial organization of genomes. *Drosophila* is an excellent model system for studying chromosomal interactions including homolog pairing. Recent work has shown that condensin II governs both interphase chromosome compaction and homolog pairing and condensin II activity is controlled by the turnover of its regulatory subunit Cap-H2. Specifically, Cap-H2 is a target of the SCF<sup>Slimb</sup> E3 ubiquitin-ligase which down-regulates Cap-H2 in order to maintain homologous chromosome pairing, chromosome length and proper nuclear organization. Here, we identify Casein Kinase I alpha (CK1 $\alpha$ ) as an additional negative-regulator of Cap-H2. CK1 $\alpha$ -depletion stabilizes Cap-H2 protein and results in an accumulation of Cap-H2 on chromosomes. Similar to Slimb mutation, CK1 $\alpha$  depletion in cultured cells, larval salivary gland, and nurse cells results in several condensin II-dependent phenotypes including dispersal of centromeres, interphase chromosome compaction, and chromosome unpairing. Moreover, CK1 $\alpha$  loss-of-function mutations dominantly suppress condensin II mutant phenotypes *in vivo*. Thus, CK1 $\alpha$  facilitates Cap-H2 destruction and modulates nuclear organization by attenuating chromatin localized Cap-H2 protein.

## Author Summary

The Cap-H2 condensin II subunit is required for interphase condensin II activity. Previous work has shown that low levels of Cap-H2 protein in interphase is achieved by SCF<sup>Slimb</sup> mediated protein turnover and limits chromatin-bound protein levels. Here we show that

Casein Kinase I alpha (CK1 $\alpha$ ) is also a negative regulator of interphase condensin II activity by promoting Cap-H2 destruction and limiting chromatin-bound Cap-H2 levels. Loss of CK1 $\alpha$  function leads to aberrant chromosome structures that are suppressed by mutation or depletion of Cap-H2 or other condensin subunits. These observations suggest that normally, interphase condensin II levels must be kept low in order to maintain proper interphase chromosome organization, and this low activity is maintained by targeted destruction of Cap-H2.

## Introduction

Interphase genome organization in eukaryotic cells is non-random [1,2,3]. Indeed, organization of the genome is crucial because it influences nuclear shape and processes such as DNA repair and replication, as well as gene expression [4, 5, 6]. While chromosomes are highly organized within the nucleus, they must also remain extremely dynamic. Chromosome dynamics facilitate events that occur not only during cell division, but also during interphase, when cells respond to developmental and environmental cues that require changes in gene expression. Interphase events include trans-interactions such as homolog pairing, chromosome remodeling and compaction, and DNA looping. Although numerous studies using Fluorescent In-Situ Hybridization (FISH), live cell imaging, and chromosome conformation capture techniques have revealed the three-dimensional (3D) organization of genomes, much remains to be discovered regarding the factors that govern the overall conformation of interphase chromosomes. An equally important task is to identify the molecular mechanisms that regulate and maintain specific 3D genome organizational states.

Condensin complexes are highly conserved from bacteria to humans [7,8,9] and have been identified as key drivers of genome organization [10]. Eukaryotes have two condensin complexes, condensin I and II, which share the core SMC2 and SMC4 (Structural Maintenance of Chromosomes) subunits but differ in their non-SMC Chromosome Associated Protein (CAP) subunits. Condensins have long been known to play vital roles in shaping mitotic chromosomes. While condensin I promotes lateral chromosome compaction, condensin II promotes axial compaction; both of which are necessary for faithful mitotic condensation and chromosome segregation [11]. Condensins also display different localization patterns: condensin I only associates with mitotic chromosomes, whereas condensin II is present in the nucleus, where it is bound to chromatin throughout the cell cycle [12,13,14,15]

In *Drosophila* cells, condensin II performs a variety of functions during interphase, including chromosome compaction, unpairing of homologous chromosomes, and driving the formation and maintenance of chromosome territories. The condensin II subunit, Cap-H2, has been shown to be the rate limiting subunit, as overexpression of Cap-H2 results in the increase of condensin II chromosome activity [16,17] [18] [19,20] [21]. Furthermore, all of these *Drosophila* Cap-H2 functions were shown to either require or be dependent on one or more other condensin subunits, such as SMC4, SMC2 and/or Cap-D3. This strongly suggests that these Cap-H2 functions are likely to be performed in the context of an active condensin II complex. *Drosophila* condensin II also plays an essential function in anaphase-I of male meiosis, where it is thought to be required for resolving entanglements between homologs as well as heterologs [17]. Strikingly, loss or depletion of condensin II function leads to lengthening of interphase chromosomes, suggesting that chromosome axial compaction must be actively maintained even after exit from mitosis [21,22]. Additionally, *Drosophila* Cap-D3 regulates the expression

of immunity genes while repressing somatic cell transposon activation, although it is unclear if these effects are linked to condensin mediated compaction activity [23,24].

In vertebrates, condensin II is required for axial compaction of chromosomes and sister chromatin resolution in S-phase [15,25]. Loss of the Cap-D3 condensin II subunit also leads to loss of compaction in S-phase [26]. That interphase chromosome compaction levels are important for gene expression has been recently highlighted in mammalian cells. Condensin II has been found to regulate the STAT5 transcription factor by highly condensing interphase chromatin during T-cell differentiation; failure to repress condensin II activity prevents STAT5 access to its binding sites, resulting in cells that are unable to differentiate normally [27]. Similarly, the bromodomain protein Brd4, recruits condensin II to chromatin and local condensation serves to attenuate signaling from the damaged DNA sites [28]. Thus physical compaction of interphase chromatin can be an effective mechanism for limiting transcription factor binding as well as modulating important signaling.

While it is evident that the role of condensin II in interphase genome organization, DNA repair, and gene expression is important in both vertebrate and *Drosophila* cells, how condensin II executes these functions is not well understood. In fact, it is unknown whether processes such as anti-pairing, gene regulation, and transposon repression are secondary effects to its potential primary role in shaping chromatin architecture. Moreover, the molecular mechanism regulating interphase condensin II remains unclear. Therefore, elucidating these regulatory mechanisms will lead to important insights into how interphase genome organization is modulated.

Previously, it was demonstrated that overexpression of the condensin II regulatory subunit, Cap-H2, was sufficient to drive both interphase compaction and the unpairing of homologous chromosomes in vivo and in cultured cells [16,20,21,22]. In contrast, mutations that inactivate other condensin II genes, by decreasing their dosage or depleting their expression by RNAi, suppress all Cap-H2 overexpression phenotypes. These observations strongly suggest that 1) Cap-H2-induced homolog anti-pairing and compaction is reliant on a functional condensin II complex, and 2) that Cap-H2 is the rate-limiting component in the activation of the catalytic SMC2/4 subunits, which are present during interphase and are able to bind chromatin. Thus, Cap-H2 availability controls condensin II activity, and consequently, Cap-H2 protein levels and chromatin localization represent key steps for SMC2/4 regulation in interphase. This idea is consistent with the observation that Cap-H2 loading onto chromatin is partially dependent on the chromodomain protein Mrg15 [21]. Moreover, Cap-H2 protein levels are controlled by the SCF<sup>Slimb</sup> ubiquitin-ligase, maintaining low levels of Cap-H2 in vivo and in cultured *Drosophila* cells [20]. Interestingly, Slimb recognizes its target proteins through a phosphodegron motif [29], suggesting that one or more kinases must phosphorylate Cap-H2 before Slimb can target it for destruction. A Slimb-binding site consensus sequence (DSGXXS) exists in the extreme C-terminus of Cap-H2 and deletion of this region renders Cap-H2 non-degradable [20]. As expected for a Slimb substrate, Cap-H2 protein mobility on SDS-PAGE was sensitive to phosphatase treatment, suggesting that Cap-H2 is phosphorylated [20].

Given that Cap-H2 protein levels may be regulated by its phosphorylation state, we set out to identify kinases that target Cap-H2 for Slimb recognition and that lead to its degradation. We show that in *Drosophila* cultured S2 cells, Casein Kinase I alpha (CK1 $\alpha$ ) depletion results in the hypercondensation of interphase chromatin in a condensin II-dependent manner. We also found that CK1 $\alpha$  and condensin II genetically interact in vivo, and that CK1 $\alpha$  depletion leads to Cap-H2 protein enrichment on polytene and cultured cell chromosomes. Similar to Slimb depletion [20], CK1 $\alpha$  depletion also results in stabilization of Cap-H2 protein in cultured cells. Our findings further elucidate the mechanism by which Cap-H2, and thus condensin II,

is regulated and contribute significantly to our understanding of how interphase genome organization, homolog pairing, and chromosome compaction is modulated.

## Results

### Casein Kinase I alpha is required for interphase chromatin reorganization

Previously, we discovered that the Cap-H2 subunit of condensin II is a SCF<sup>Slimb</sup> ubiquitination-target in *Drosophila* cells [20]. In a whole genome RNAi screen, Slimb was also identified as a homolog pairing-promoting factor, and it was shown to affect pairing in a Cap-H2 dependent manner [18]. In cultured S2 and Kc cells, depletion of SCF<sup>Slimb</sup> components Slimb, Cul-1 and SkpA prevents Cap-H2 degradation and leads to condensin II hyperactivation during interphase and the remodeling of each chromosome into a compact globular structure (Fig. 1A-C). Based on their overall appearance, we refer to these hypercondensed chromosomes as “chromatin-gumballs” (Fig. 1A). Overexpression of a GFP tagged wild type Cap-H2 also induces this phenotype [20]. Since phosphorylation of the Slimb-binding domain within its substrate is required for Slimb binding [29], we reasoned that depletion of a kinase involved in this pathway would also stabilize Cap-H2 and phenocopy the effect on chromatin remodeling observed after Slimb depletion.

We first analyzed S2 cells that were depleted of either: Glycogen Synthase Kinase 3 Beta (GSK3 $\beta$ ), Protein Kinase A (PKA), or Casein Kinase I alpha (CK1 $\alpha$ ). We chose these three kinases because they typically phosphorylate Slimb targets to initiate their degradation [30] [31,32] [33,34]. Strikingly, depletion of only CK1 $\alpha$  resulted in a dramatic increase in the formation of chromatin-gumballs in interphase cells that was comparable to Slimb depletion (Fig. 1F). CK1 $\alpha$  depletion was verified indirectly by assessing Armadillo (*Drosophila*  $\beta$ -catenin) protein levels, as the use of CK1 $\alpha$  antibodies to *Drosophila* CK1 $\alpha$  [35] and commercially available anti-human CK1 $\alpha$  were both unsuccessful. CK1 $\alpha$  and Slimb function to negatively regulate Armadillo, therefore we probed Armadillo protein levels to confirm that CK1 $\alpha$  and Slimb were efficiently being depleted in our RNAi treatments, as previously shown [32,34]. In addition to the S2 cells, identical gumball phenotypes were observed in CK1 $\alpha$ -depleted Kc cells, as previously observed in Slimb depleted cells (Fig. 1B-D). CK1 $\alpha$  depletion in S2 cells induced chromatin-gumball formation (weak and strong) to levels significantly higher ( $p < 7.5 \times 10^{-8}$ ) than control-treated cells (CK1 $\alpha$  RNAi: 89  $\pm$  4%; control RNAi: 1  $\pm$  0.17%; sum percentage of weak and strong gumballs) (Fig. 1F). To rule out the possibility that the observed gumball phenotypes in the CK1 $\alpha$  depleted cells were a result of apoptosis, we assessed cell viability in our Kc cell RNAi treatments. CK1 $\alpha$  did not increase cell death over that of control treated cells (control RNAi: 18  $\pm$  2.4%; CK1 $\alpha$  RNAi: 16.7  $\pm$  3.9%) (S1A and B Fig.). In addition to RNAi, we also inactivated CK1 $\alpha$  in cultured S2R+ cells with the cell permeable CK1 chemical inhibitor D4476 (Fig. 1G-H) [36,37]. We observed that D4476 significantly increased ( $p < 0.01$ ) the proportion of chromatin-gumball formation (weak and strong) compared to DMSO-treated control cells (DMSO: 7.9  $\pm$  1.5%, D4476: 62  $\pm$  6%; sum percentage of weak and strong gumballs) (Fig. 1I). Thus, similar to SCF<sup>Slimb</sup>, CK1 $\alpha$  depletion by RNAi or pharmacological inhibition with the D4476 leads to global chromatin remodeling.

We next tested whether the CK1 $\alpha$  RNAi-induced gumball phenotype is dependent on condensin II activity. To test this, we co-depleted both CK1 $\alpha$  and the condensin II non-SMC subunits Cap-D3 or Cap-H2 in both Kc and S2 cells (Fig. 1E-F). Co-depletion of CK1 $\alpha$  with either subunits resulted in a significant suppression (CK1 $\alpha$  + Cap-D3 RNAi:  $p < 0.0005$ , CK1 $\alpha$  + Cap-H2 RNAi:  $p < 3.9 \times 10^{-6}$ ; comparison between percentage of normal cells) of the chromatin-gumball phenotype. Interestingly, CK1 $\alpha$  co-depletion with Cap-D3 did not suppress the

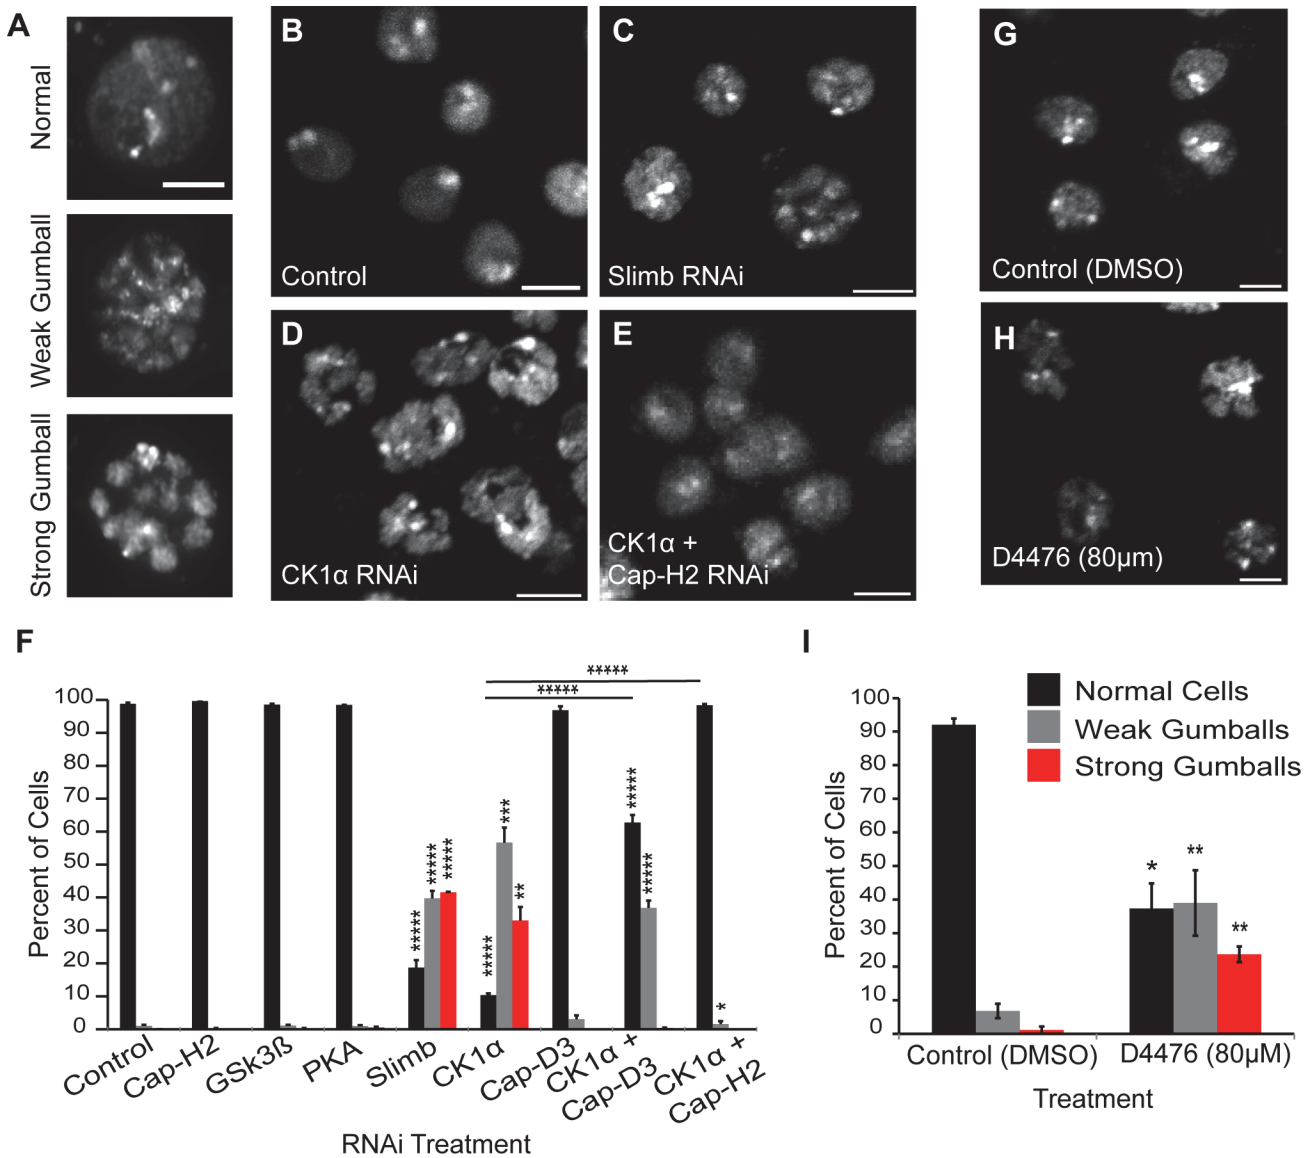

**Fig 1. CK1α inactivation alters interphase chromosome morphology.** (A) Representative micrographs of *Drosophila* cultured S2 cells displaying different chromatin-gumball phenotype classifications. Scale, 2.5μm. (B-E) Micrographs of 6 day RNAi-treated Kc cells stained with DAPI to visualize DNA. Depletion of Slimb (C) or CK1α (D) but not control (B) promotes the chromatin-gumball phenotype, while double RNAi with CK1α and Cap-H2 (E) suppresses this phenotype. Scale, 5μm. (F) Frequency histogram of the nuclear phenotypes in S2 cells after 6-day depletion of the indicated proteins via RNAi; (n = 2200–4200 cells per treatment). (G-H) Micrographs of S2R+ cells stained with DAPI to visualize DNA. Treatment of cells with the CK1 inhibitor D4476 (80μM) (H) for 8 hours promotes chromatin-gumball phenotype not observed with control DMSO treatment (G). Scale, 5μm. (I) Frequency histogram of the nuclear phenotypes in S2R+ cells after treatment with control (DMSO) or CK1 inhibition (D4476); (n = 110–170 cells per treatment). p-value = \* < 0.05, \*\* < 0.01, \*\*\* = < 0.005, \*\*\*\* = < 0.001, \*\*\*\*\* = < 0.0001 (calculated by using students' t-test in Microsoft excel). Horizontal lines on histograms represent comparisons between percentage of normal cells of two treatments at either end of the line. Error bars in all figures indicate SEM. (A-E,G-H) Maximum projection image of multiple z-slices.

doi:10.1371/journal.pgen.1005014.g001

gumball phenotype as well as co-depletion with Cap-H2 (CK1α + Cap-D3 RNAi: 62 ± 2.3% normal nuclei, CK1α + Cap-H2 RNAi: 98 ± 0.35% normal nuclei) (Fig. 1F). These observations suggest that in the absence of CK1α, condensin II-mediated hyper-compaction of interphase chromosomes.

## CK1 $\alpha$ prevents dispersal of centromeres

One function of condensin II in cultured cells and in vivo is to drive dispersal of centromeres, as visualized by immunostaining of Centromeric Identifier (CID) protein or by FISH to pericentric heterochromatin [20,22]. It has been proposed that centromere dispersal is a direct consequence of chromosome compaction [18,22]. The results from our RNAi experiments suggest that CK1 $\alpha$  may be functioning to repress Cap-H2, as co-depletion of CK1 $\alpha$  with Cap-H2 strongly suppresses the gumball phenotype (Fig. 1E-F). Stabilization of Cap-H2 protein levels, if functional, is expected to drive dispersal of centromeric regions and result in a greater number of CID foci in each nucleus. To test this hypothesis, cultured *Drosophila* cells (Kc and S2) were depleted of CK1 $\alpha$  *via* RNAi treatment and immunostained using an antibody specific to CID. The number of CID spots per nucleus was counted, with an increase in CID spots per nucleus indicating an increase in centromere dispersal. CID spots in control treated cells appear clustered, whereas CK1 $\alpha$  depletion results in CID signal dispersal and a significant increase ( $p < 3 \times 10^{-6}$ ) in the number of CID spots (for Kc cells, CK1 $\alpha$  RNAi:  $4.7 \pm 0.17$  and Control RNAi:  $3.6 \pm 0.13$  spots per nucleus) (Fig. 2A,E,H-I). Furthermore, this increase in CID dispersal was suppressed when either condensin subunits SMC2 or Cap-H2 were co-depleted with CK1 $\alpha$  (CK1 $\alpha$  + SMC2 RNAi:  $3.9 \pm 0.16$  and CK1 $\alpha$  + Cap-H2 RNAi:  $3.76 \pm 0.15$  spots per nucleus) (Fig. 2F-I). In addition, co-depletion of the Condensin I specific subunit Barren (*Drosophila* Cap-H) with CK1 $\alpha$  did not suppress the increase in CID dispersal (CK1 $\alpha$  + Barren RNAi:  $4.8 \pm 0.18$  spots per nucleus) (S2C Fig.). Similar to Slimb, CK1 $\alpha$  acts as an inhibitor of condensin II mediated centromere dispersal (Fig. 2D-E,H). This was also observed in S2 cells (S2A Fig. and B). To exclude the possibility that the increases in CID dispersal may be explained by an increase in cell ploidy, DNA content in RNAi treated cells was analyzed by flow cytometry. Flow cytometry on S2 cells demonstrates that CK1 $\alpha$  depletion slightly increases the proportion of cells in G1 (CK1 $\alpha$  RNAi: 51.5% and Control RNAi: 42.4%) (S3C Fig.), therefore, the increase in number of CID foci in CK1 $\alpha$  RNAi cells is not due to increases in centromere numbers resulting from polyploidy. These results indicate that CK1 $\alpha$  is normally acting to inhibit condensin II dependent centromere dispersal.

## CK1 $\alpha$ antagonizes condensin II mediated chromosome axial compaction

In addition to promoting the dispersal of centromeric regions, Cap-H2 has been shown to be important for maintenance of interphase chromosome axial length [21,22]. If CK1 $\alpha$  is a negative regulator of Cap-H2, then CK1 $\alpha$  depletion should lead to an increase in chromosome compaction and a decrease in axial length. To measure chromosome compaction, we performed 3D DNA FISH in RNAi treated cultured cells using three probes specific to euchromatic loci on the X chromosome (Fig. 3). FISH probes were designed approximately 2Mb apart. We found that CK1 $\alpha$  depletion resulted in a significant decrease in pairwise 3D distances between FISH probes compared to control treated cells (X1-X2 =  $p < 0.0004$ , X1-X3 =  $p < 0.001$ ) (Fig. 3A,D,G). In control treated cells, the distance between X1 and X2 probes was  $0.96 \pm 0.04 \mu\text{m}$  and the distance between X1 and X3 probes was  $1.08 \pm 0.05 \mu\text{m}$ . CK1 $\alpha$  depletion caused these distances to decrease about 20% to  $0.76 \pm 0.05 \mu\text{m}$  between X1 and X2 probes and  $0.85 \pm 0.04 \mu\text{m}$  between X1 and X3 probes. This increase in chromosome compaction resulting from depletion of CK1 $\alpha$  suggests that CK1 $\alpha$  normally antagonizes chromosome compaction. Interestingly, CK1 $\alpha$  co-depletion with condensin subunits SMC2 or Cap-H2 increased the axial length of chromosomes, relative to control treated cells (CK1 $\alpha$  + SMC2 RNAi: X1-X2 =  $1.5 \pm 0.1 \mu\text{m}$  and X1-X3 =  $1.4 \pm 0.07 \mu\text{m}$ , CK1 $\alpha$  + Cap-H2 RNAi: X1-X2:  $1.4 \pm 0.1 \mu\text{m}$  and X1-X3 =  $1.7 \pm 0.1 \mu\text{m}$ ) (Fig. 3E-G). We noted that the axial chromosome length seen with co-depletion of CK1 $\alpha$  with SMC2 or Cap-H2 was

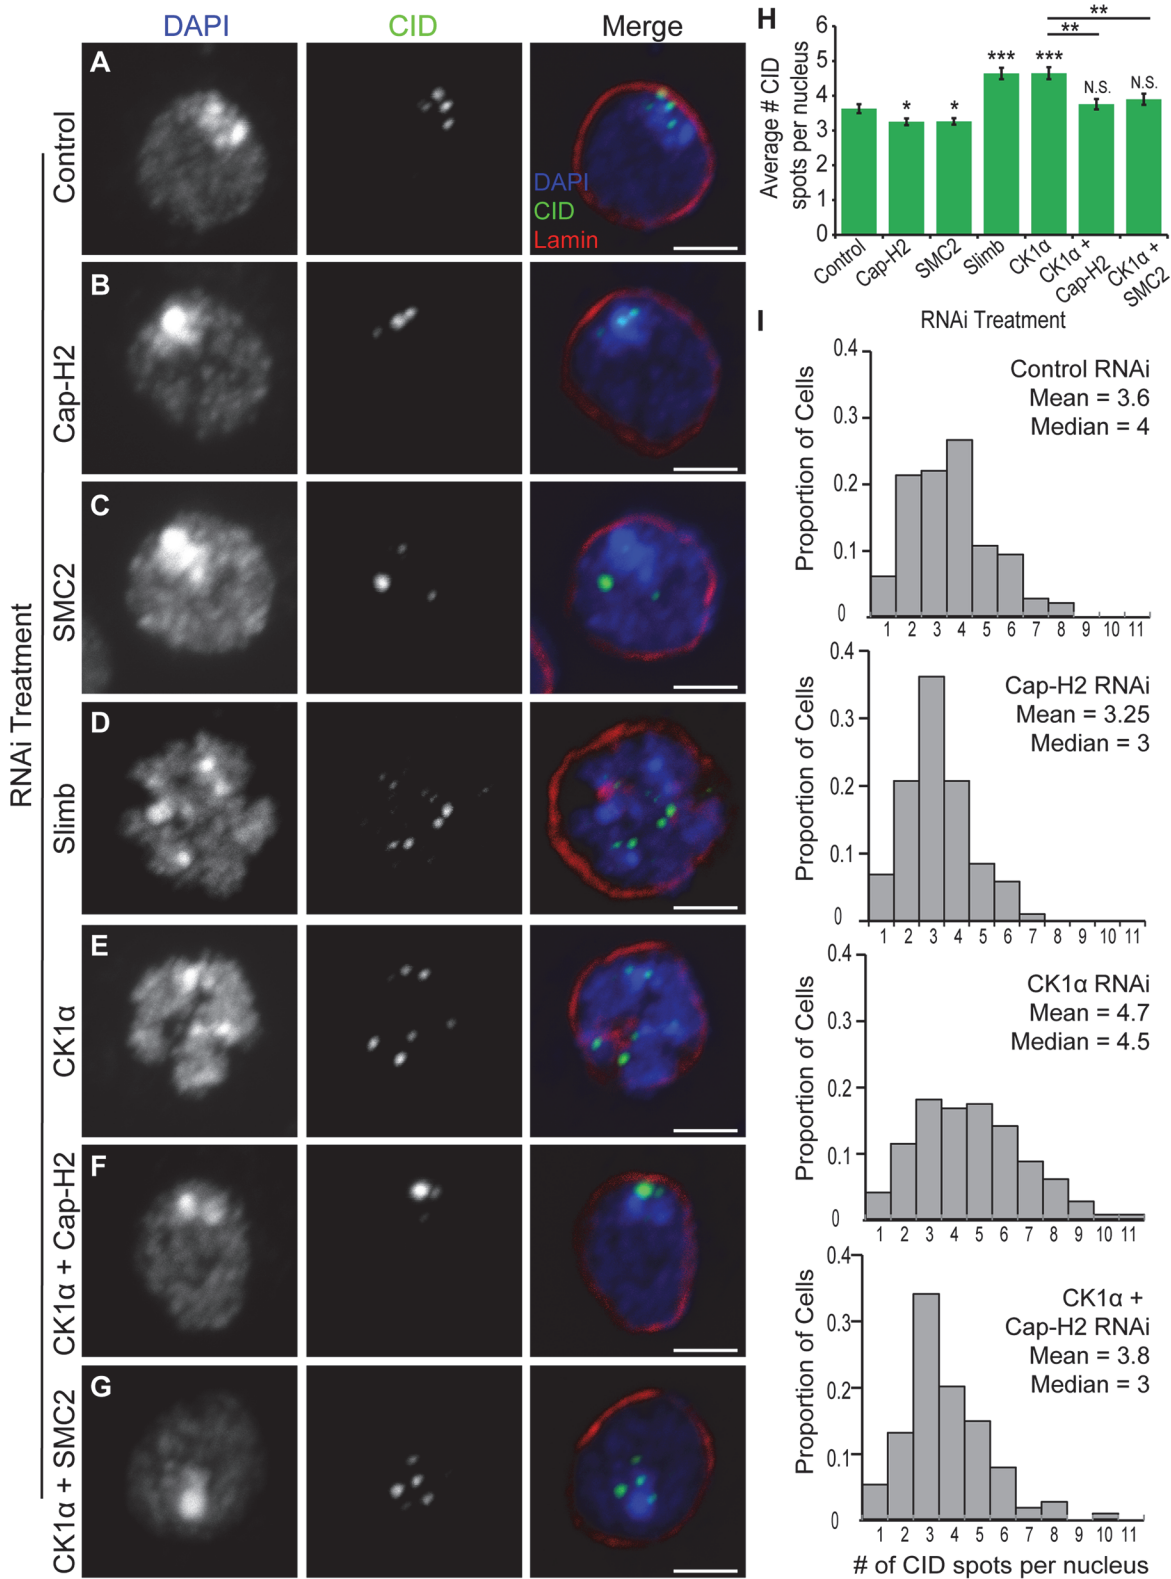

**Fig 2. RNAi of CK1 $\alpha$  leads to dispersal of centromeres in Kc cells.** (A-G) RNAi treated Kc cells immunostained for centromeric protein (CID, green), Lamin Dm0 (red), and counterstained for DNA (DAPI, blue). CK1 $\alpha$  RNAi (E) induces abnormal CID dispersal similar to Slimb RNAi (D), which is suppressed by double RNAi of CK1 $\alpha$  + Cap-H2 (F) or CK1 $\alpha$  + SMC2 (G). Scale, 2.5 $\mu$ m. (H) Histogram showing average number of CID spots per nucleus after RNAi depletion of the indicated protein. Slimb and CK1 $\alpha$  depletion results in a significant increase in average number of CID spots per nucleus; (n = 115–180 cells

per treatment). (I) Histograms showing the distribution of CID spots per nucleus. CK1 $\alpha$  depletion results in an increased proportion of cells with higher than normal CID spots; (n = 115–150 cells per treatment). N.S. = No significance. p-value = \* < 0.05, \*\* < 0.005, \*\*\* < 0.0001 (calculated by using students' t-test in Microsoft excel). Statistical comparisons are between RNAi treatments and control, unless denoted by horizontal line between bars. Error bars in all figures indicate SEM. (A–G) Maximum projection image of multiple z-slices.

doi:10.1371/journal.pgen.1005014.g002

significantly increased compared to depletion of Cap-H2 or SMC2 alone ( $p < 0.05$  for X-chromosome probes X1-X2 and X1-X3, Fig. 3G). It is unclear why co-depletion of CK1 $\alpha$  and condensin II subunits would lead to the observed axial lengthening that is greater than in control cells.

We considered the possibility that CK1 $\alpha$  depletion led to a mitotic arrest phenotype where chromosome compaction status could be due to mitotic condensation. Control cells and CK1 $\alpha$  depleted cells were stained with anti-lamin and the mitotic marker anti-phospho-histone H3 (phospho-H3) to assess whether the RNAi treated cells were undergoing mitosis. We found that the number of phospho-H3 positive cells in CK1 $\alpha$  depleted cells was not significantly increased compared to control cells. In fact, CK1 $\alpha$  depleted cells showed a significant decrease in phospho-H3 positive cells (CK1 $\alpha$  RNAi =  $0.71 \pm 0.12\%$ , Control =  $2.15 \pm 0.11\%$ ;  $p < 3.36 \times 10^{-7}$ ) (S3A Fig. and B). Furthermore, nuclear envelope staining by anti-lamin and DNA visualization by DAPI staining both indicated that the vast majority (>95%) of cells examined were in interphase. Lastly, flow cytometry measuring DNA content of RNAi treated S2 cells also demonstrated that there was only moderate differences in cell cycle profile of CK1 $\alpha$  depleted and CK1 $\alpha$ , Cap-H2 co-depleted cells compared to control RNAi treated cells (S3C Fig.). Thus, these data demonstrating that CK1 $\alpha$  functions to inhibit chromosome compaction in cultured cells provide strong evidence that CK1 $\alpha$  limits interphase condensin II activity, and that these compaction differences cannot be explained by dramatic shifts in cell cycle distribution.

## CK1 $\alpha$ promotes homologous chromosome pairing

Cap-H2 and other condensin II subunits have been shown to function as factors that antagonize homologous chromosome pairing during interphase [16,18,19]. In contrast, Slimb has been identified as a pairing-promoting factor that negatively regulates the Cap-H2 anti-pairing activity [18,20]. Therefore, we predicted that CK1 $\alpha$  also is a pairing promoting factor not identified in previous chromosome pairing screens. To test this, we performed FISH in RNAi treated Kc cells using FISH probes designed to label two different euchromatic loci on the X chromosome. Homolog pairing can be assessed by counting the number of fluorescent spots per nucleus for each of the two probes. A single spot for each FISH probe signifies chromosomes are paired, whereas two spots signify unpairing of homologs. Normally, homologs are paired in most Drosophila cells, and in Kc cells at levels of 85% or greater [18,38]. CK1 $\alpha$  depletion results in an increase in unpairing of chromosomes compared to control cells, evident by the significant increase ( $p < 1.3 \times 10^{-8}$ ) in number of FISH spots counted per nucleus (control RNAi: X1 =  $1.3 \pm 0.04$  and X2 =  $1.2 \pm 0.04$ , CK1 $\alpha$  RNAi: X1 =  $2.5 \pm 0.16$  and X2 =  $2 \pm 0.11$  spots per nucleus) (Fig. 3A,D,H and S2D Fig.). To test whether this increase in unpairing was condensin dependent, cells were treated with RNAi to both CK1 $\alpha$  and Cap-H2 or CK1 $\alpha$  and SMC2 (Fig. 3E–F). Depletion of either Cap-H2 or SMC2 suppressed the increased unpairing caused by CK1 $\alpha$  RNAi (CK1 $\alpha$  + Cap-H2 RNAi: X1 =  $1.8 \pm 0.1$  and X2 =  $1.3 \pm 0.08$ , CK1 $\alpha$  + SMC2 RNAi: X1 =  $1.6 \pm 0.08$  and X2 =  $1.4 \pm 0.08$  spots per nucleus) (Fig. 3H). We also depleted the condensin I specific subunit, Barren (Cap-H), along with CK1 $\alpha$  and found that co-depletion did not significantly suppress the increased unpairing seen with CK1 $\alpha$  RNAi (CK1 $\alpha$  + Barren RNAi: X1 =  $2.3 \pm 0.1$  and X2 =  $2 \pm 0.1$  spots per nucleus) (S2D Fig. and E). This indicates that adding a double-stranded RNA targeting CK1 $\alpha$  and a second gene does not lead to suppression of anti-pairing activity simply by diluting the CK1 $\alpha$  RNAi-depletion. Instead, this



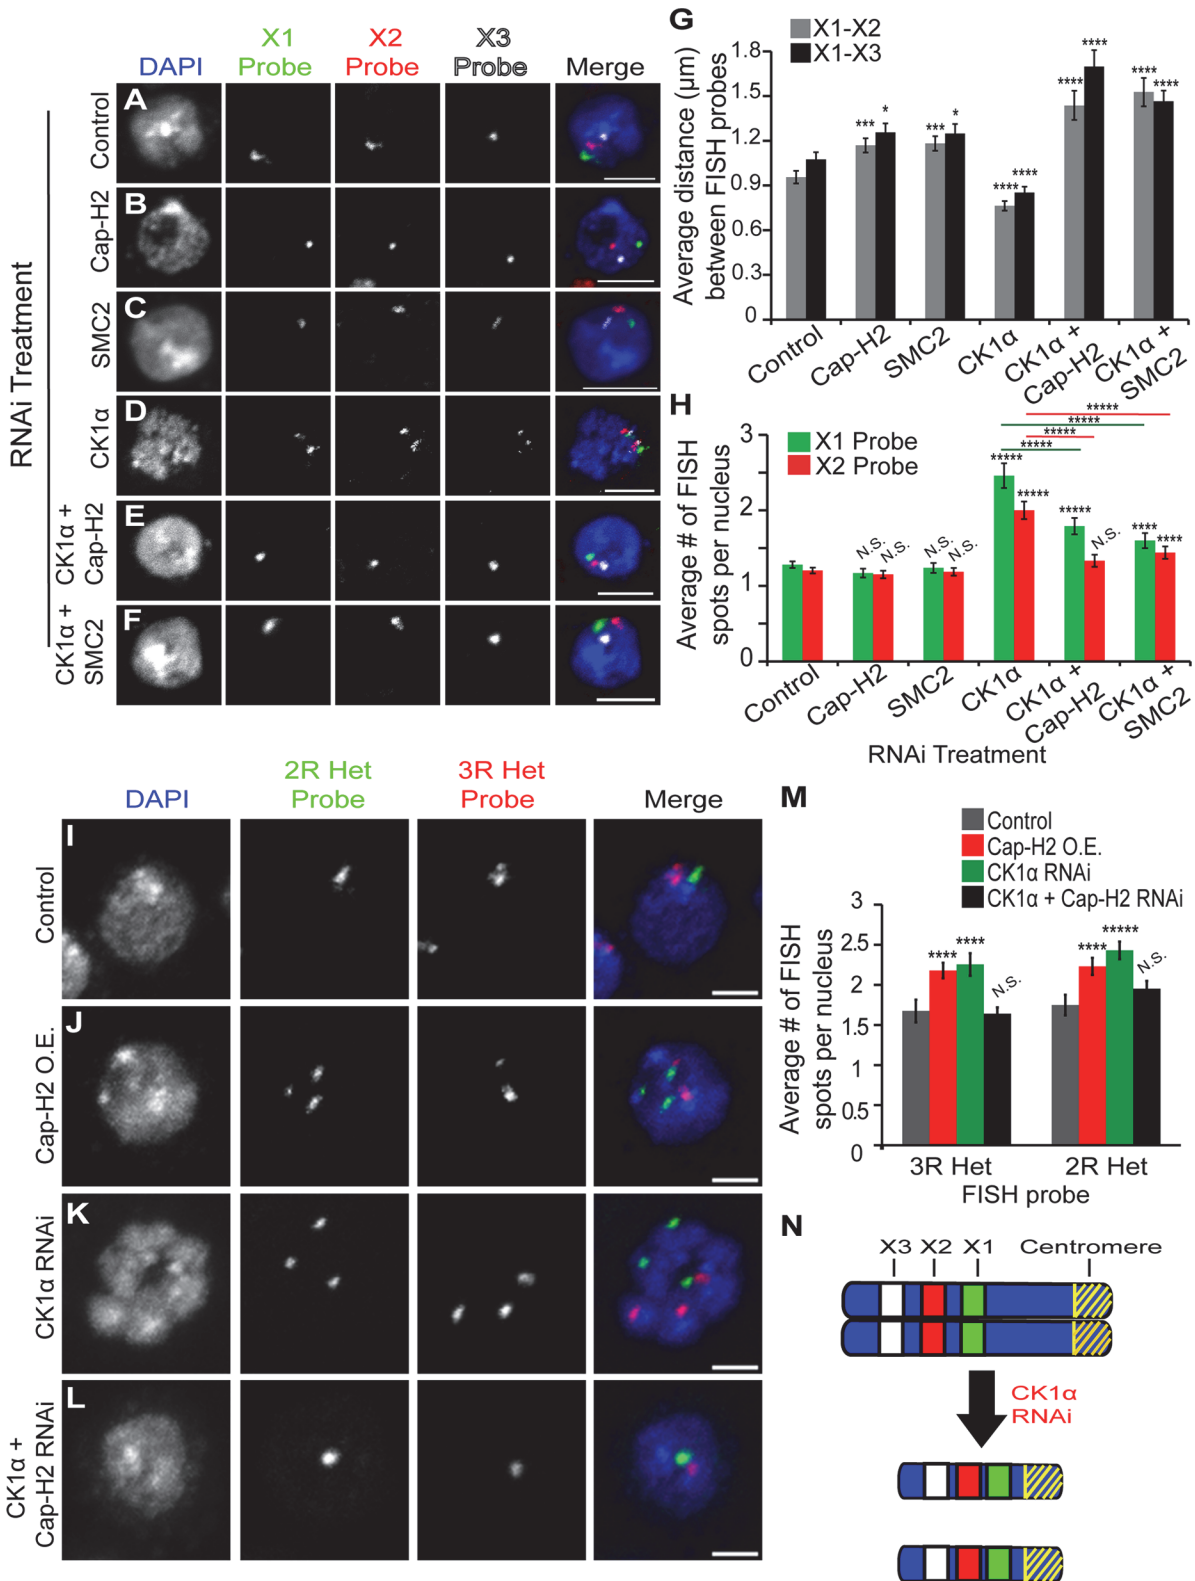

**Fig 3. CK1α depletion increases chromosome compaction and unpairing activity in Kc cells.** (A-F) Micrographs of RNAi treated Kc cells stained for DAPI (blue) and three different euchromatic FISH probes specific for the X chromosome (green, red, and white). Single FISH spot for each probe signifies that the homologs are paired and multiple FISH spots indicate the unpairing of chromosomes. Scale, 5µm. (G) Histogram showing the average 3D distance between pairwise FISH spots in microns in RNAi treated Kc cells (n = 45–100 cells per treatment). CK1α RNAi significantly reduces the distance between

FISH spots, and this reduction is suppressed by double RNAi of CK1 $\alpha$  + Cap-H2 or CK1 $\alpha$  + SMC2. (H) Histogram showing the average number of FISH spots per nucleus in RNAi depleted Kc cells (n = 50–110 cells per treatment). CK1 $\alpha$  RNAi significantly increases the number of FISH spots, and this increase is suppressed by double RNAi of CK1 $\alpha$  + Cap-H2 or CK1 $\alpha$  + SMC2. (I-L) Micrographs of RNAi treated Kc cells stained with FISH probes specific to heterochromatin on Chromosome 2R (green) and 3R (red) and counterstained for DNA (DAPI, blue). Cap-H2 overexpression (J) and CK1 $\alpha$  depletion (K) induces unpairing of heterochromatin, which is suppressed by double RNAi of CK1 $\alpha$  + Cap-H2 (L). Scale, 2.5 $\mu$ m. (M) Histogram showing average number of heterochromatin FISH spots per nucleus after RNAi depletion of the indicated protein. CK1 $\alpha$  depletion results in a significant increase in number of FISH spots; (n = 40–78 cells per treatment). (N) Diagram of X chromosomes. Blue represents the DNA, yellow diagonal stripes represents the centromere, and green (X1), red (X2), and white (X3) rectangles represent FISH probes used for compaction and unpairing experiments. Depletion of CK1 $\alpha$  via RNAi results in compaction and unpairing of chromosomes. N.S. = No significance. p-value = \* < 0.05, \*\* < 0.01, \*\*\* < 0.005, \*\*\*\* < 0.001, \*\*\*\*\* < 0.0001 (calculated by using students' t-test in Microsoft excel). Error bars in all figures indicate SEM. (A-F, I-L) Maximum projection image of multiple z-slices.

doi:10.1371/journal.pgen.1005014.g003

strongly suggests that the pairing promoting function of CK1 $\alpha$  is likely due to its ability to repress condensin II anti-pairing activity.

In addition to the X1 and X2 probes specific to euchromatic loci, FISH probes specific to heterochromatic sequences on the right arms of chromosomes 2 and 3 (2R and 3R) were used to assess the pairing status of heterochromatin. Similar to the observations at the euchromatic loci, FISH using heterochromatin probes exhibited the same behavior, showing that CK1 $\alpha$  promotes pairing at euchromatin and heterochromatin. Depletion of CK1 $\alpha$  significantly increased (p < 0.005) the number of spots per nucleus for each of the two heterochromatic FISH probes used, compared to control treated cells (CK1 $\alpha$  RNAi: 3R = 2.25  $\pm$  0.14 and 2R = 2.43  $\pm$  0.11, control RNAi: 3R = 1.68  $\pm$  0.14 and 2R = 1.75  $\pm$  0.13 spots per nucleus) (Fig. 3I,K,M and S2F Fig.). This increase in heterochromatin unpairing was similar to that observed when an inducible GFP tagged version of full-length Cap-H2 was expressed in cells (Cap-H2 O.E.: 3R = 2.18  $\pm$  0.1, 2R = 2.23  $\pm$  0.11 spots per nucleus) (Fig. 3J,M and S2F Fig.). The increase in unpairing of both euchromatic and heterochromatic loci after CK1 $\alpha$  depletion is consistent with what is observed when Cap-H2 activity is increased and provide further evidence that CK1 $\alpha$  functions as a pairing promoting factor by antagonizing condensin II anti-pairing function.

### CK1 $\alpha$ maintains polytene chromosome pairing in larvae

Based on the increased level of chromosome unpairing observed in CK1 $\alpha$  depleted cultured cells, we wanted to test whether CK1 $\alpha$  is repressing condensin II mediated chromosome organization in vivo. In order to do this, we turned to the salivary glands of *Drosophila* third instar larvae. Salivary gland nuclei contain polytene chromosomes that are highly paired. We have previously shown that overexpression of Cap-H2 is sufficient for driving unpairing of homologs and sister chromatids that are normally paired into polytenes chromosomes [16], and Slimb-RNAi depletion resulted in the disruption of polytene chromosomes [20]. If CK1 $\alpha$  is negatively regulating Cap-H2 in vivo, then RNAi depletion of CK1 $\alpha$  is expected to also drive polytene disruption, as has been shown for Slimb RNAi in the salivary gland. To test this, we performed FISH on whole mount salivary glands from third instar larvae, using the number of FISH spots as a direct measure of chromatid and homolog pairing (increased FISH spots indicates increased unpairing). We used FISH probes specific to euchromatic regions on chromosome X and the left arm of chromosome 2 to assay pairing at two loci. We found that salivary glands depleted of CK1 $\alpha$  displayed a significant increase (p < 7.2x10<sup>-7</sup>) in the number of FISH spots compared to the controls (*43B>Gal4* driver without CK1 $\alpha$ -RNAi) with both FISH probes (Control: X = 1.3  $\pm$  0.09 and 2L = 1.1  $\pm$  0.04, CK1 $\alpha$  RNAi: X = 17.3  $\pm$  1.83 and 2L = 20.9  $\pm$  2.94 spots per nucleus) (Fig. 4). The increase in the number of FISH spots indicates that polytene chromosomes are unpaired in the CK1 $\alpha$  RNAi expressing larvae. These data demonstrate that RNAi depletion of CK1 $\alpha$  in vivo leads to increased unpairing of polytene chromosome, consistent with CK1 $\alpha$  being a negative regulator of condensin II anti-pairing activity. Note that these FISH probes cannot distinguish between unpairing of chromatids and unpairing of homologs,

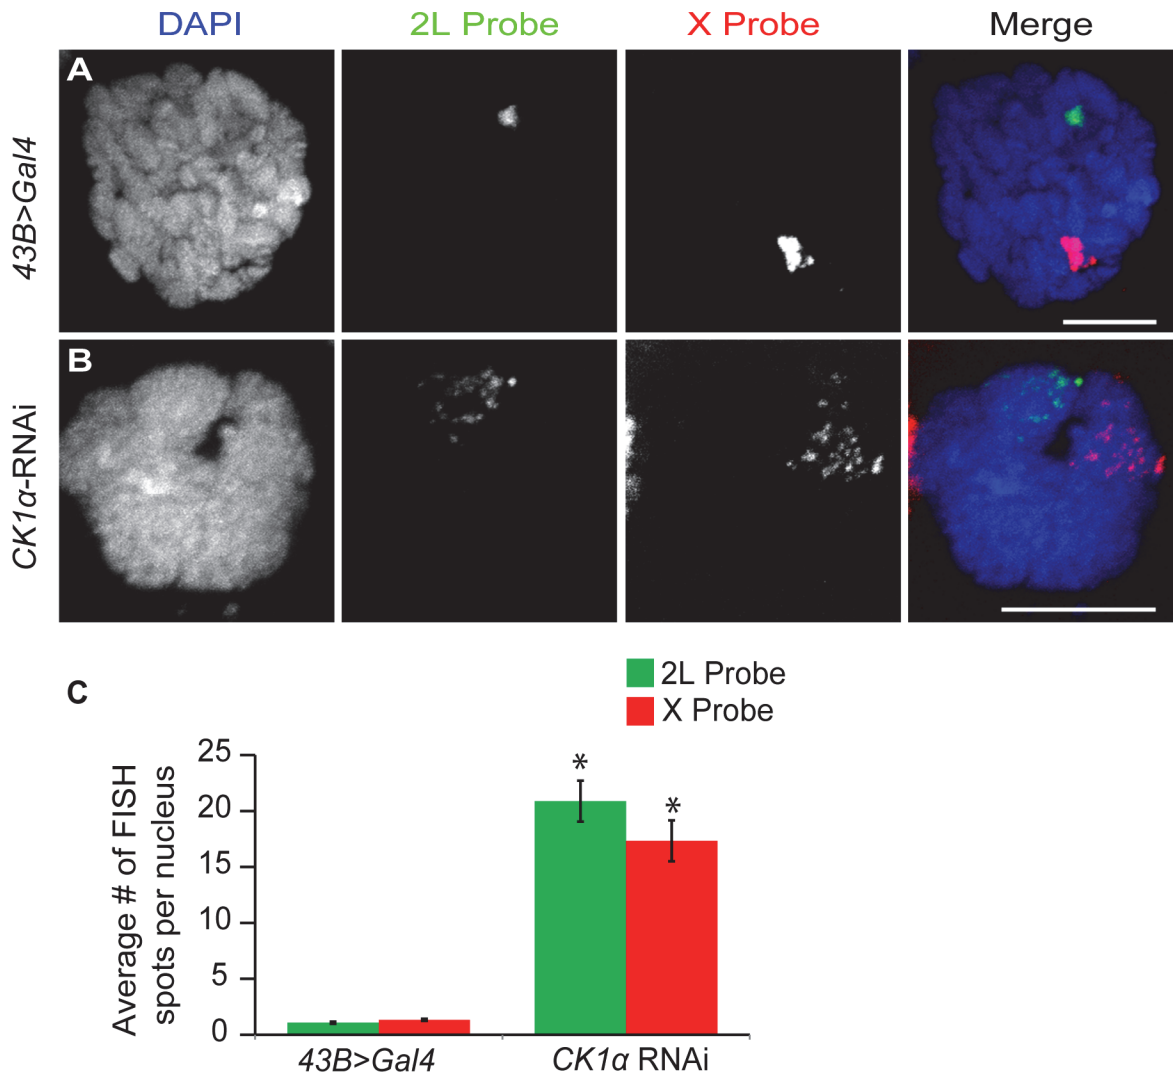

**Fig 4. CK1 $\alpha$  is required for polytene pairing in *Drosophila* salivary glands.** (A-B) Salivary gland nuclei from control larvae (*43B>Gal4*; Gal4 under a salivary gland specific driver) (A) and larvae expressing hairpin RNAi to CK1 $\alpha$  (*CK1 $\alpha$ <sup>RNAi</sup>*) driven by *43B>Gal4* (B) were hybridized with FISH probes specific to a region of Chromosome 2L (green) and Chromosome X (red) and counterstained with DAPI (blue). Chromosomes are highly paired in control (fewer FISH foci) (A) nuclei whereas expression of a TRiP hairpin RNAi targeting *CK1 $\alpha$*  (B) induces unpairing of the chromosomes (multiple FISH foci). (C) Histogram showing average number of FISH spots per nucleus after CK1 $\alpha$  RNAi is expressed in the salivary glands. CK1 $\alpha$  depletion results in an increase in number of FISH spots for both 2L and X probes; (n = 24–38 nuclei per genotype). \*p-value < 7.2x10<sup>-7</sup> (calculated by using students' t-test in excel). Error bars indicate SEM. (A-B) DAPI channel image is a single z-slice from the nucleus and FISH channel images are from maximum projection image of multiple z-slices. Scale, 10 $\mu$ m.

doi:10.1371/journal.pgen.1005014.g004

and therefore we infer that disruption of paired homologous sequences includes chromatin fibers from both sisters and homologs.

These data suggest that CK1 $\alpha$  and Slimb may function together to antagonize condensin II activity. Therefore, it is possible that CK1 $\alpha$ , Slimb double mutants phenocopy Cap-H2 overexpression phenotypes. Because both CK1 $\alpha$  and Slimb genes are essential for viability making homozygous mutants of either gene is not possible. However, given that Slimb heterozygotes can rescue condensin II partial loss of function phenotypes[20], we speculated that CK1 $\alpha$ /+; Slimb/+ double heterozygous mutants may be sufficient to produce Cap-H2 gain-of-function phenotypes. To investigate whether CK1 $\alpha$  and Slimb genetically interact to produce Cap-H2 gain-of-function phenotypes we created flies that were heterozygous for both CK1 $\alpha$  and Slimb and measured

chromosome pairing levels. For these experiments, we used two different Slimb heterozygous mutant alleles: *Slimb*<sup>UU11/+</sup> (null mutant) or *Slimb*<sup>3A1/+</sup> (loss of function), in a CK1 $\alpha$  heterozygous mutant (*CK1 $\alpha$* <sup>8B12/+</sup>, null mutant) background. We did not observe a significant increase in number of FISH spots (increased unpairing) in salivary glands of larvae heterozygous for both CK1 $\alpha$  and Slimb, when compared to wild-type and single heterozygous mutants (for 2L probe, *Oregon-R*: 1.21  $\pm$  0.08, *CK1 $\alpha$* <sup>8B12/+</sup>: 1.15  $\pm$  0.06, *Slimb*<sup>UU11/+</sup>: 1.2  $\pm$  0.07, *Slimb*<sup>3A1/+</sup>: 1.07  $\pm$  0.05, *CK1 $\alpha$* <sup>8B12/+</sup>; *Slimb*<sup>UU11/+</sup>: 1.19  $\pm$  0.16, *CK1 $\alpha$* <sup>8B12/+</sup>; *Slimb*<sup>3A1/+</sup>: 1.09  $\pm$  0.05 spots per salivary gland nucleus, [S4 Fig](#)). Additionally, an increase in FISH spots was not observed in CK1 $\alpha$  or Slimb single heterozygous mutant larval polytenes, when compared to a wild-type control (*Oregon-R*). Thus, reducing either Slimb or CK1 $\alpha$  dosage by half or reducing dosage of both by half is not sufficient to produce condensin II gain-of-function phenotypes in salivary glands. This may be because in salivary glands, having one normal copy of CK1 $\alpha$  and/or Slimb is sufficient to maintain normal chromosome pairing status.

### Cap-H2 and CK1 $\alpha$ genetically interact to regulate chromosome pairing in polyploid nurse cells

To test whether CK1 $\alpha$  and Cap-H2 genetically interact in other tissues, we examined polytene chromosome pairing in the *Drosophila* ovary. Ovarian nurse cells are highly polyploid, and these polyploid chromosomes switch from a highly paired state (polytene) to an unpaired state during stage 5/6 of development [39]. We have previously shown that condensin II and, more specifically, Cap-H2, is required for this developmental switch in pairing state [16]. Flies homozygous for Cap-H2 mutations fail to unpair their chromosomes at this stage 5-to-6 transition. Combining a Cap-H2 heterozygous mutation (*Cap-H2*<sup>z3-0019/+</sup>) with an SMC4 heterozygous mutation (*SMC4*<sup>k00819/+</sup>) also results in an intermediate chromosome unpairing defect. We tested whether the introduction of a mutation in CK1 $\alpha$  into this double heterozygous (*SMC4*<sup>k00819/+</sup>; *Cap-H2*<sup>z3-0019/+</sup>) background would modify the condensin II nurse cell unpairing defect. The *CK1 $\alpha$* <sup>8B12</sup> allele is a missense mutation in the *CK1 $\alpha$*  gene that transforms a glycine into an aspartic acid within the kinase domain and is thought to be a null allele [40]. We hypothesized that loss of about half the normal gene dose of normal kinase activity in the CK1 $\alpha$  heterozygous mutant may lead to sufficient stabilization of endogenous Cap-H2 protein. Stabilization of Cap-H2 is predicted to suppress the polytene unpairing defect observed in the *SMC4*<sup>k00819/+</sup>; *Cap-H2*<sup>z3-0019/+</sup> double heterozygous mutants. To test this, we used FISH probes to X chromosome and 2<sup>nd</sup> chromosome sequences on whole-mount ovaries and examined stage 10 nurse cells, as previously described [20,21]. We chose to examine stage 10 nurse cells specifically because any defects in unpairing should be evident at this later developmental stage. Control flies wild-type for all three genes displayed 25.9  $\pm$  2.83 spots for the 2L probe and 27.3  $\pm$  2.59 spots for the X probe per nurse cell nucleus ([Fig. 5A,G](#)). Nurse cells from flies harboring a heterozygous *CK1 $\alpha$* <sup>8B12</sup> mutation alone did not significantly increase the number of FISH spots (2L = 21.2  $\pm$  1.5 and X = 23.3  $\pm$  1.9 spots per nurse cell nucleus) ([Fig. 5B,G](#)), likely due to the chromosomes already being unpaired to their maximal degree at this developmental stage. In flies with double heterozygous mutations in condensin II (*SMC4*<sup>k00819/+</sup>; *Cap-H2*<sup>z3-0019/+</sup>), the stage 10 nurse cell nuclei displayed 1.9  $\pm$  0.2 and 5.1  $\pm$  0.6 spots per nurse cell nucleus for the 2L and X probe, respectively ([Fig. 5D,G](#)). This significant decrease ( $p < 4 \times 10^{-8}$ ) in number of FISH spots represents a failure of these chromosomes to unpair, consistent with our previous findings [16]. However, introducing a *CK1 $\alpha$* <sup>8B12/+</sup> heterozygous mutant allele into the double heterozygous condensin II mutant background (*SMC4*<sup>k00819/+</sup>; *Cap-H2*<sup>z3-0019/+</sup>) increased the number of FISH spots back to wild type levels (2L = 23.5  $\pm$  1.4 and X = 25  $\pm$  1.0 spots per nurse cell nucleus;  $p$ -value compared to condensin II double mutant:  $p < 1.4 \times 10^{-12}$ ;  $p$ -value compared

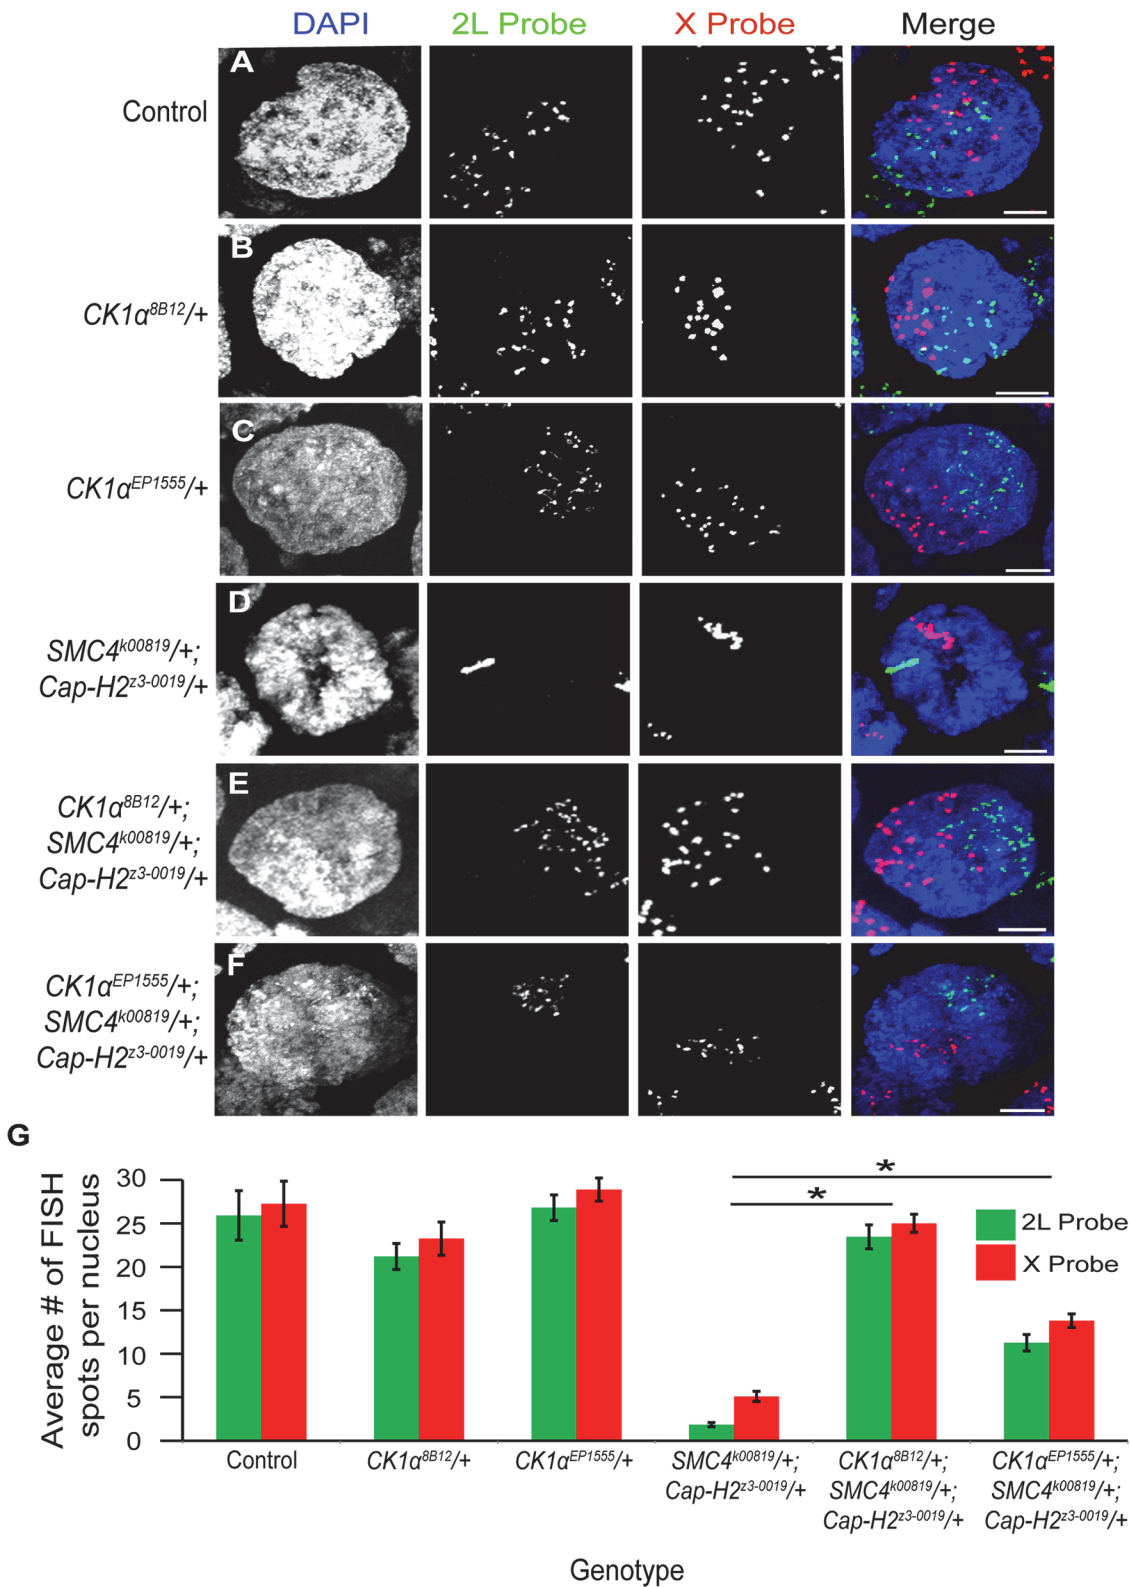

**Fig 5. CK1α mutations suppress condensin II loss of function unpairing phenotype in polyploid nurse cells.** (A-F) Micrographs of stage 10 nurse cell nuclei from control (triple balancer) (A), *CK1α<sup>8B12/+</sup>* heterozygote mutant (B), *CK1α<sup>EP1555/+</sup>* heterozygote mutant (C), condensin II double heterozygous mutant *SMC4<sup>k00819/+</sup>; Cap-H2<sup>z3-0019/+</sup>* (D), *CK1α<sup>8B12/+</sup>* heterozygote in condensin II double heterozygous background (*CK1α<sup>8B12/+</sup>; SMC4<sup>k00819/+</sup>; Cap-H2<sup>z3-0019/+</sup>*) (E), and *CK1α<sup>EP1555/+</sup>* heterozygote in condensin II double heterozygous background (*CK1α<sup>EP1555/+</sup>; SMC4<sup>k00819/+</sup>; Cap-H2<sup>z3-0019/+</sup>*) (F) were stained with

FISH probes specific to Chromosome 2L (green) and Chromosome X (red) and counterstained with DAPI (DNA, blue). Condensin II loss of function mutants (*SMC4*<sup>k00819/+</sup>; *Cap-H2*<sup>z3-0019/+</sup>) (D) show a defect in chromosome unpairing (fewer FISH spots), which is strongly suppressed when a *CK1 $\alpha$* <sup>8B12/+</sup> heterozygous mutation (E) is introduced into this background (dispersal of FISH spots). *CK1 $\alpha$* <sup>EP1555/+</sup> shows similar but weaker suppression when introduced into condensin II double heterozygous background (F). (G) Histogram showing the average number of FISH spots for each probe in stage 10 nurse cells (n = 15–26 nurse cells per genotype). Error bars indicate SEM. \*p-value < 2.2x10<sup>-10</sup> (calculated by using students' t-test in MS Excel). (A-F) Maximum projection image of multiple z-slices. Scale, 10 $\mu$ m.

doi:10.1371/journal.pgen.1005014.g005

to control: p = 0.44) (Fig. 5E,G). This triple heterozygous mutant (*CK1 $\alpha$* <sup>8B12/+</sup>; *SMC4*<sup>k00819/+</sup>; *Cap-H2*<sup>z3-0019/+</sup>) was able to completely suppress the unpairing deficiency seen in the condensin II mutants, suggesting that reducing CK1 $\alpha$  dosage to half is sufficient to suppress the stage 10 nurse cell condensin II-dependent polytene unpairing defects. This genetic interaction is consistent with CK1 $\alpha$  functioning as a negative regulator of condensin II activity.

In addition to the *CK1 $\alpha$* <sup>8B12</sup> allele, we also tested two other *CK1 $\alpha$*  heterozygous mutants. The *CK1 $\alpha$* <sup>EP1555</sup> allele is a P-transposable element insertion into the promoter of *CK1 $\alpha$*  [41]. The *CK1 $\alpha$* <sup>G0492</sup> allele [42] is a CK1 $\alpha$  mutation derived from a P-element lacW insertion into the *CK1 $\alpha$*  gene. When crossed into the condensin II double heterozygous mutant background (*SMC4*<sup>k00819/+</sup>; *Cap-H2*<sup>z3-0019/+</sup>), both the *CK1 $\alpha$* <sup>EP1555</sup> and the *CK1 $\alpha$* <sup>G0492</sup> mutants significantly suppressed the nurse cell chromosome unpairing defect (*CK1 $\alpha$* <sup>EP1555/+</sup>; *SMC4*<sup>k00819/+</sup>; *Cap-H2*<sup>z3-0019/+</sup>; 2L = 11.3  $\pm$  1.0 and X = 13.8  $\pm$  0.8 spots per nurse cell nucleus; p < 2.3x10<sup>-10</sup>, *CK1 $\alpha$* <sup>G0492/+</sup>; *SMC4*<sup>k00819/+</sup>; *Cap-H2*<sup>z3-0019/+</sup>; 2L = 11.4  $\pm$  0.6; p < 1.2x10<sup>-14</sup>) (Fig. 5F-G and S5D-E Fig.). However, these additional mutants did not suppress the unpairing defect as well as the *CK1 $\alpha$* <sup>8B12/+</sup> mutant. The *CK1 $\alpha$* <sup>EP1555</sup> and *CK1 $\alpha$* <sup>G0492</sup> alleles were only able to rescue the condensin II unpairing defect to levels approximately 50% of the control flies. It is possible that these two additional mutants, *CK1 $\alpha$* <sup>EP1555/+</sup> and the *CK1 $\alpha$* <sup>G0492/+</sup>, are not complete protein nulls, like the *CK1 $\alpha$* <sup>8B12</sup> mutation. Nevertheless, three different and independently derived alleles of *CK1 $\alpha$*  suppress the condensin II unpairing defect, providing strong genetic support for CK1 $\alpha$  functioning as a negative regulator of Cap-H2 in vivo. These observations are also consistent with CK1 $\alpha$  RNAi depletion in cultured cells resulting in hyper-activation of Cap-H2 chromosome anti-pairing function (Fig. 3H,M,N).

### CK1 $\alpha$ limits chromatin bound Cap-H2 levels in salivary glands

A possible mechanism for CK1 $\alpha$  regulation of condensin II activity may be by maintaining low levels of chromatin bound Cap-H2. To test whether chromatin bound Cap-H2 is elevated in response to reduction of CK1 $\alpha$  levels, we performed immunostaining on polytene chromosomes from salivary glands of third instar larvae. Maintaining a low level of Cap-H2 in this tissue is necessary for the maintenance of the highly paired state of polytene chromosomes, as overexpression of Cap-H2 can drive these chromosomes to become highly unpaired [16]. Salivary glands were dissected from wild type control and CK1 $\alpha$  heterozygous mutants, squashed onto microscope slides, and immunostained for Cap-H2 to assess levels of endogenous chromatin bound protein. Two different CK1 $\alpha$  mutants, *CK1 $\alpha$* <sup>8B12</sup> and *CK1 $\alpha$* <sup>EP1555</sup> were used (as in Fig. 5), each containing an independently derived disruption of the *CK1 $\alpha$*  gene. Salivary glands from wild-type (*Oregon R*) and CK1 $\alpha$  mutants were squashed onto the same microscope slide such that all chromosome spreads simultaneously received the same mixture of washes and antibody reagents, as previously described [43]. This approach allowed us to use identical imaging parameters to make comparisons between different genotypes from the same slide. In wild type (*Oregon-R*) salivary glands, Cap-H2 is present on the chromatin at low levels (Fig. 6A-B) and requires a higher exposure to detect the protein signal. However, salivary glands from mutants with either of the two heterozygous CK1 $\alpha$  mutations show a visibly higher level of Cap-H2 on the chromatin, which is apparent even at the lower exposure, demonstrating that chromatin

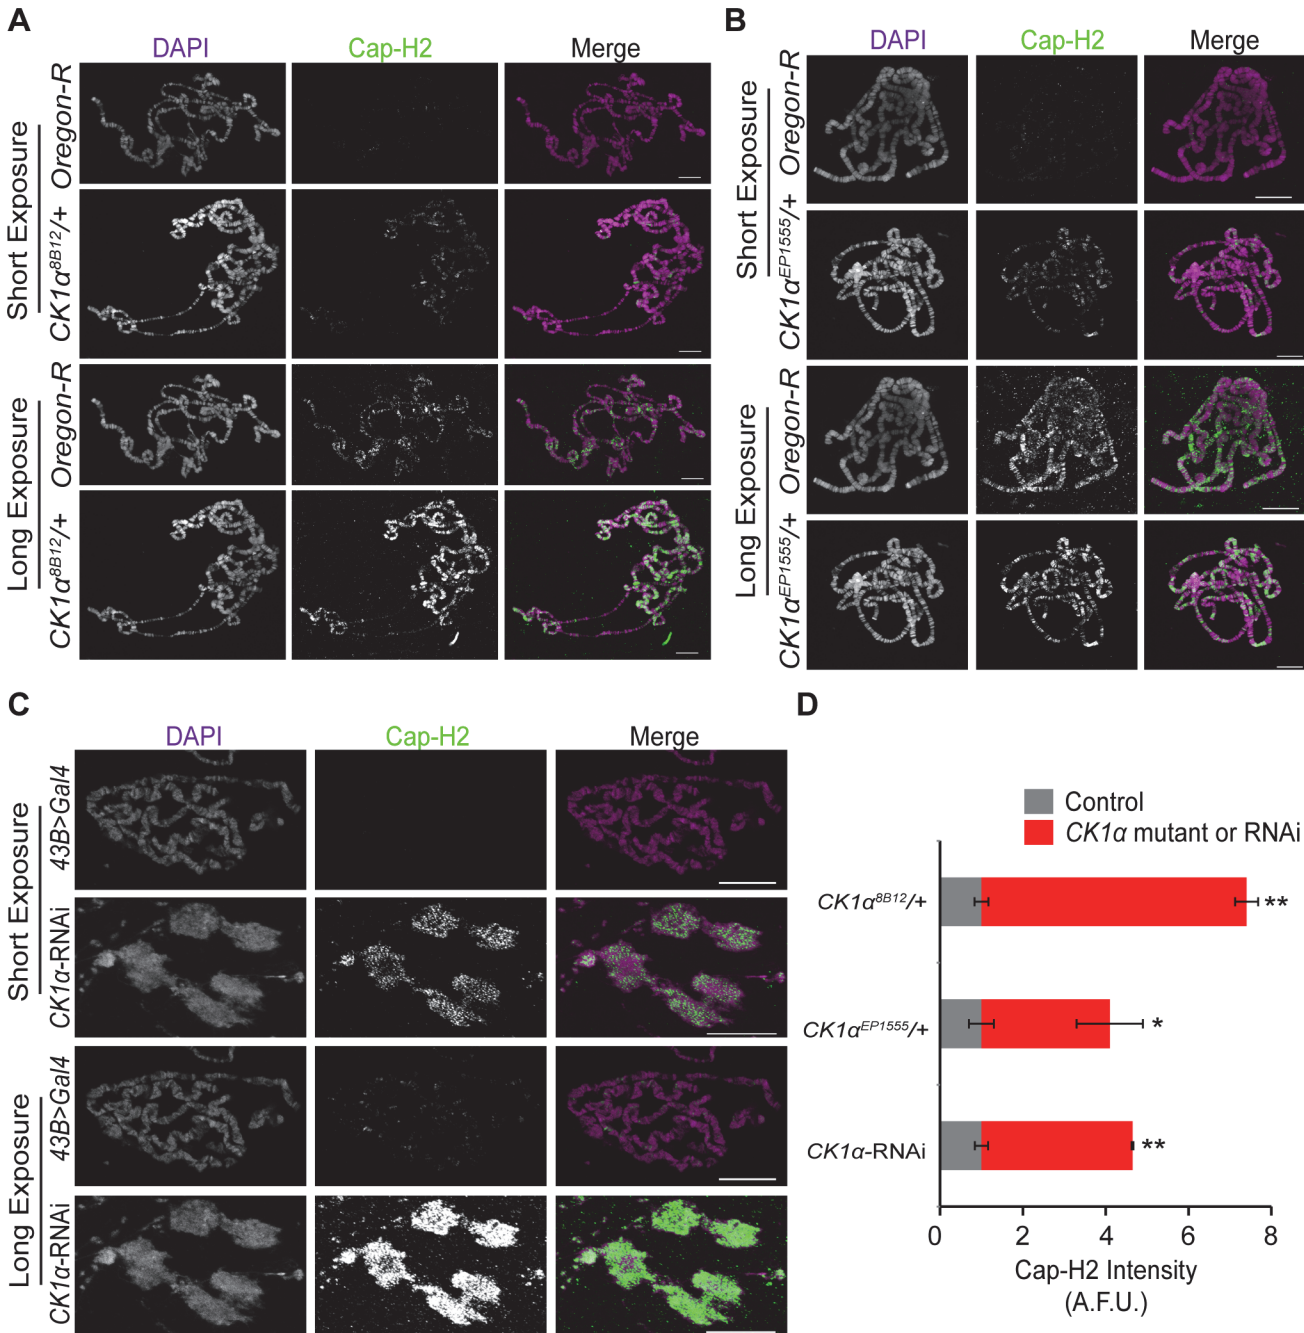

**Fig 6. CK1α limits chromatin bound Cap-H2 levels and activity in *Drosophila* salivary glands.** (A-B) Micrographs of salivary glands from larvae of wild-type (Oregon-R) and CK1α heterozygous mutants (CK1α<sup>8B12/+</sup> and CK1α<sup>EP1555/+</sup>) squashed, immunostained for Cap-H2 (green) and counterstained for DNA (DAPI, magenta) on the same glass microscope slide. (C) Micrographs of salivary glands from *Drosophila* larvae of control (43B>Gal4) and larvae expressing RNAi to CK1α (CK1α<sup>RNAi</sup>) squashed, immunostained for Cap-H2 (green) and counterstained for DNA (DAPI, magenta) on the same glass microscope slide. Short and long camera exposures were used in order to show that chromatin bound Cap-H2 levels are increased in both CK1α mutants and CK1α RNAi depleted cells. (C) CK1α RNAi resulted in loss of polytene banding and suggests that chromosomes are unpaired (see Fig. 4). (D) Histogram showing quantitation of fluorescence intensity of Cap-H2 bound to squashed salivary gland chromosomes. CK1α reduction via mutation or RNAi results in significant enrichment of Cap-H2 over same slide controls, assessed by comparing normalized Cap-H2 fluorescence (gray value) intensities (see methods for details); (n = 5–6 fields of squashed chromosomes per genotype). Images shown were not used for analysis. Images used for fluorescence intensity quantitation were acquired such that pixel saturation was minimized. Error bars indicate SEM. p-value = \* < 0.05, \*\* < 0.0001 (calculated by using students' t-test in Microsoft excel). Statistical comparisons are between mutant or RNAi depleted cells and their control on the same slide (mutant control = Oregon-R; RNAi control = 43B>Gal4). Maximum projection images of multiple z-slices are shown for all panels. Scale, 20μm in all panels.

doi:10.1371/journal.pgen.1005014.g006

bound Cap-H2 protein levels are elevated (Fig. 6A-B). Quantitation of fluorescence intensity confirms that Cap-H2 protein levels on the salivary gland chromosomes is significantly higher in CK1 $\alpha$  heterozygous mutants ( $CK1\alpha^{8B12/+}$ ;  $p < 1.8 \times 10^{-7}$ ,  $CK1\alpha^{EP1555/+}$ ;  $p < 0.05$  when compared to wild-type controls) (Fig. 6D). These results suggest that CK1 $\alpha$  is required to maintain low levels of chromatin bound Cap-H2, as half dosage CK1 $\alpha$  mutation is sufficient to increase chromatin bound Cap-H2.

In addition to the CK1 $\alpha$  heterozygous mutants, we performed immunostaining for Cap-H2 in flies expressing CK1 $\alpha$  RNAi under a UAS-regulated promoter crossed with a  $43B > Gal4$  transgene, a salivary gland specific driver [44]. Similar to the results seen with the CK1 $\alpha$  heterozygous mutants, CK1 $\alpha$  RNAi resulted in a visible increase in chromatin bound Cap-H2 (Fig. 6C). The significant increase ( $p < 4.4 \times 10^{-5}$ ) in Cap-H2 fluorescence intensity confirms this observation (Fig. 6D). In addition to the increased level of Cap-H2 staining on the DNA, we also noticed chromosome aberrations, where the polytene banding pattern was clearly disrupted. These abnormal chromosome structures are reminiscent of the unpaired chromosomes seen in whole mount salivary gland nuclei that are overexpressing Cap-H2 (Fig. 4) [16,22]. The abnormal chromosomes also display a higher intensity of Cap-H2 staining (Fig. 6D) and further support the idea that an increase in Cap-H2 levels via CK1 $\alpha$  depletion is driving the chromosomes to become highly unpaired.

### Casein Kinase I Alpha is required for Cap-H2 degradation

Depletion of CK1 $\alpha$  resulted in increased condensin II activity and chromatin bound Cap-H2 levels. We next wanted to test if CK1 $\alpha$  is functioning to degrade Cap-H2 protein. In order to do this, we assayed Cap-H2 levels in cultured cells treated with CK1 $\alpha$  RNAi. In order to functionally validate depletion of CK1 $\alpha$  by RNAi, the level of the Slimb and CK1 $\alpha$  substrate Armadillo was determined by immunocytochemistry [32,34]. Slimb and CK1 $\alpha$  normally function to repress Armadillo protein levels. RNAi depletion of CK1 $\alpha$  resulted in stabilization of Armadillo to levels higher than that of Slimb depletion, confirming efficient depletion of CK1 $\alpha$  (Fig. 7A). Whole cell extracts from cultured S2 cells stably expressing an inducible Cap-H2-EGFP depleted of CK1 $\alpha$  by RNAi showed stabilization of EGFP tagged Cap-H2 as compared to control treated cells (Fig. 7A). In addition, Kc cells treated with the CK1 inhibitor D4476 also resulted in stabilization of a transiently transfected and induced Cap-H2-GFP protein (Fig. 7B). These results further support the idea that CK1 $\alpha$  negatively regulates condensin II through its subunit, Cap-H2, as depletion or inhibition of CK1 $\alpha$  results in stabilization of Cap-H2 protein.

Based on the results of stabilization of Cap-H2 when CK1 $\alpha$  is inhibited in cultured cells and the increase in Cap-H2 fluorescence on CK1 $\alpha$  mutant salivary gland chromosomes (Figs. 6 and 7A-B), we hypothesized that a normal function of CK1 $\alpha$  may be to limit chromatin bound Cap-H2 levels. In order to test this, we performed cellular fractionations to ask if chromatin bound Cap-H2 levels were stabilized in the absence of CK1 $\alpha$ . For these experiments, we used a Kc cell line that stably expresses an inducible Cap-H2-EGFP and treated them as before with RNAi. CK1 $\alpha$ -RNAi depletion resulted in an increase of chromatin bound Cap-H2-EGFP by  $40 \pm 0.11\%$ , as compared to chromatin extracts from control-RNAi treated cells (Fig. 7D-E). This result demonstrates that CK1 $\alpha$  is negatively modulating both whole cell and more specifically, chromatin bound Cap-H2 protein levels. More importantly, this suggests that CK1 $\alpha$  normally inhibits condensin II activity in part by limiting the levels of chromatin bound Cap-H2 protein.

### CK1 $\alpha$ depletion does not affect Slimb and Cap-H2 interaction

We previously demonstrated that Slimb and Cap-H2 proteins co-immunoprecipitate [20]. Based on reports of how CK1 $\alpha$  is required for Slimb interaction with its targets, for example



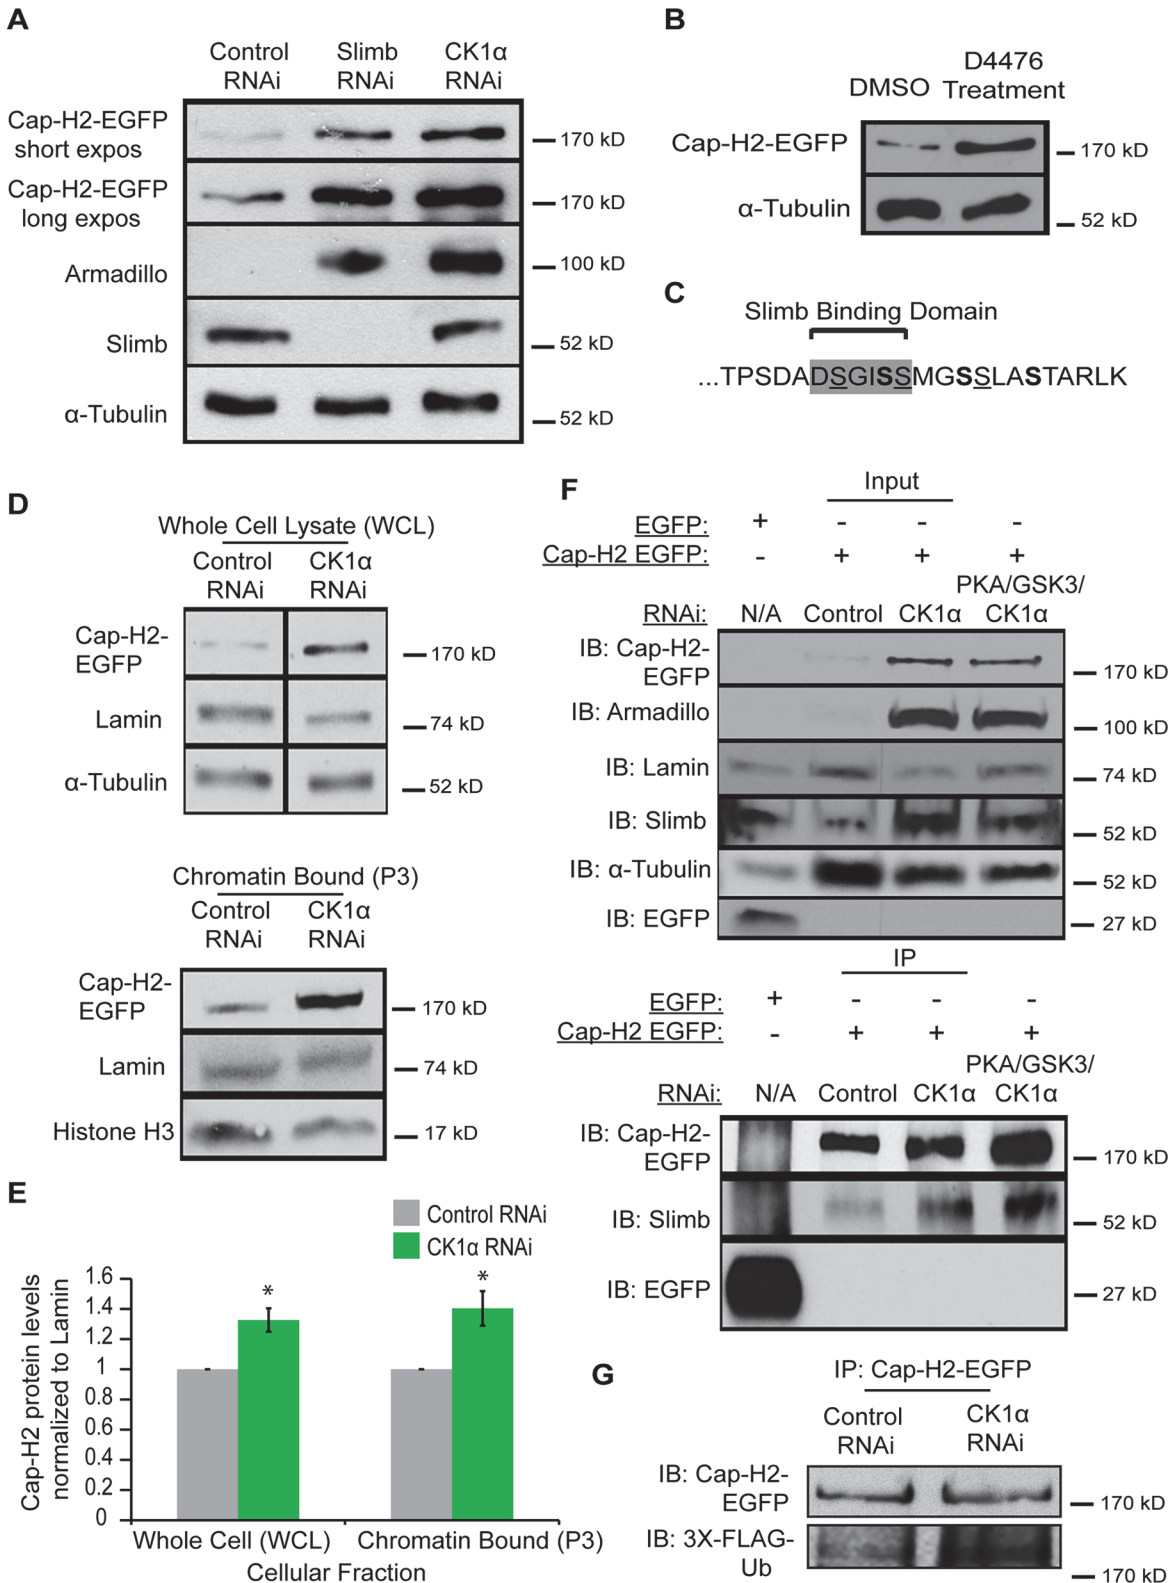

**Fig 7. Cap-H2 degradation is CK1 $\alpha$  dependent.** (A) Whole cell lysates from RNAi treated S2 stable line expressing an inducible Cap-H2-EGFP were immunoblotted for the indicated proteins. Both Slimb and CK1 $\alpha$  depletion stabilizes Cap-H2-EGFP. Armadillo is targeted for destruction by Slimb and CK1 $\alpha$  and is used to confirm knockdown of CK1 $\alpha$  and Slimb. (B) Kc cells were transiently transfected with a plasmid containing an inducible Cap-H2-EGFP, and then treated with either DMSO (control) or 80 $\mu$ M of CK1 inhibitor (D4476) for 8 hours, and lysates were immunoblotted for the indicated proteins. Anti-alpha-Tubulin

was used as protein loading control in panels A and B. (C) Amino acid sequence of C-terminal 23 amino acids of *Drosophila* Cap-H2. Consensus Slimb binding domain DSGISS highlighted in grey. This contains three S-X-X-S motifs, where the underlined serines denote potential priming sites and bold serines indicate potential CK1 $\alpha$  phosphorylation sites and X can be any amino acid. (D) Cellular fractions of RNAi treated Kc stable line expressing an inducible Cap-H2-EGFP immunoblotted for the indicated proteins. CK1 $\alpha$  depletion stabilizes Cap-H2-EGFP in both the whole cell lysate (WCL, top immunoblot) and the chromatin bound (P3, bottom immunoblot) cellular fractions. Anti- $\alpha$ -Tubulin was used as loading control for WCL, Anti-Histone-H3 was used as loading control for P3, and Anti-Lamin-Dm0 was used as loading control for both WCL and P3. (E) Fold enrichment of Cap-H2-EGFP protein levels from (D). CK1 $\alpha$  depletion stabilizes whole cell (WCL) and chromatin bound (P3) Cap-H2-EGFP protein levels when normalized to Lamin. Calculated using densitometry in ImageJ. Error bars indicate SEM. p-value = \* < 0.05. (calculated by using students' t-test in Microsoft excel). (n = 4 biological replicates). (F) Immunoprecipitations and immunoblots from RNAi treated Kc cells, transiently transfected with inducible EGFP as a negative control and Kc cells stably expressing an inducible Cap-H2-EGFP. Anti-Cap-H2-EGFP immunoprecipitates Slimb in control, CK1 $\alpha$ , and PKA/GSK3 $\beta$ /CK1 $\alpha$  depleted cells expressing Cap-H2-EGFP. GFP tag only transfected cells did not immunoprecipitate Slimb. Anti-armadillo was used to verify CK1 $\alpha$  and PKA/GSK3 $\beta$ /CK1 $\alpha$  depletion and anti-Lamin-Dm0 and anti- $\alpha$ -tubulin was used as protein loading control. (G) Immunoprecipitations and immunoblots from RNAi treated S2 cells, transiently co-transfected with inducible Cap-H2-EGFP and inducible 3X-Flag-Ubiquitin. Anti-Cap-H2-EGFP immunoprecipitates 3X-Flag-Ub in both control and CK1 $\alpha$  depleted cells expressing Cap-H2-EGFP.

doi:10.1371/journal.pgen.1005014.g007

the Beta-Catenin/Armadillo, Ci and Cdc25 proteins[34,45,46], we speculated that CK1 $\alpha$  is also required for Slimb interacting with Cap-H2 and promoting Cap-H2 ubiquitination. To test this, we performed immunoprecipitations in CK1 $\alpha$ -RNAi depleted Kc cells that stably expressed an inducible Cap-H2-EGFP. To our surprise, when Cap-H2-EGFP was immunoprecipitated, endogenous Slimb also co-immunoprecipitated in both control-RNAi treated and CK1 $\alpha$ -RNAi treated cells (Fig. 7E). Slimb did not co-immunoprecipitate with EGFP tag only controls transiently transfected into untreated Kc cells. Similar results were observed in S2 cells transiently transfected with GFP tag only and Cap-H2-EGFP (S6 Fig.). The unexpected result of CK1 $\alpha$  depletion having no effect on Cap-H2 and Slimb interaction led us to postulate that an additional kinase(s) may be functioning upstream of CK1 $\alpha$  to prime Cap-H2, permitting Slimb interaction. We decided to perform immunoprecipitations in Kc stable cells that were codepleted of PKA, GSK3 $\beta$ , and CK1 $\alpha$ . As discussed earlier, PKA and GSK3 $\beta$  have been shown to work with CK1 $\alpha$  to phosphorylate Slimb substrates. Surprisingly, Cap-H2-EGFP and Slimb interaction remained unperturbed in the PKA, GSK3 $\beta$ , and CK1 $\alpha$  co-depleted cells (Fig. 7F). Furthermore, to see if Cap-H2 was still being ubiquitinated in CK1 $\alpha$  depleted cells, immunoprecipitations were performed in RNAi treated S2 cells co-transfected with Cap-H2-EGFP and 3xFLAG-tagged ubiquitin. In both control-RNAi and CK1 $\alpha$ -RNAi depleted cells, immunoprecipitated Cap-H2-EGFP was found to be labeled with FLAG-ubiquitin (Fig. 7G). These observations are surprising because Slimb interaction with its protein targets is thought to result in target-protein proteolysis. However, here we observe that although both CK1 $\alpha$  and Slimb are required for targeting Cap-H2 for degradation, Slimb can still interact with Cap-H2 when stabilized by CK1 $\alpha$  depletion. We speculate on possible explanations in the discussion.

## Discussion

*Drosophila* condensin II functions in interphase genome organization through its role in regulating chromosome compaction, homolog pairing and dispersal of centromeres [16,18,19,20,21,22]. In this study, we report a previously unidentified role of Casein Kinase I Alpha (CK1 $\alpha$ ). We find that CK1 $\alpha$  is an important modulator of interphase genome organization, regulating homologous chromosome pairing, centromere clustering, and chromosome compaction in *Drosophila* cultured cells and in vivo. Furthermore, we show that CK1 $\alpha$  affects these processes by attenuating interphase condensin II activity as CK1 $\alpha$  function is required for protein turn-over of the Cap-H2 condensin II subunit.

Using an RNAi based approach in *Drosophila* cultured cells, we observed that depletion of CK1 $\alpha$  resulted in perturbation of interphase nuclear morphology (Fig. 1). We also find that CK1 $\alpha$  functions to prevent centromere dispersal (Fig. 2 and S2 Fig.), inhibits chromosome compaction (Fig. 3), and promotes chromosome pairing (Figs. 3,4,5 and S2 and S5 Figs.).

These observations are consistent with the changes seen when Cap-H2 is overexpressed. In cultured *Drosophila* cells, co-depletion of CK1 $\alpha$  with the condensin II subunit Cap-H2 results in suppression of abnormal centromere dispersal, suppression of chromosome hyper-compaction, and suppression of chromosome unpairing (Figs. 1,2,3 and S2 Fig.). These observations strongly suggest that CK1 $\alpha$  and Cap-H2 interact genetically. This interaction is also observed in vivo, as the *Drosophila* nurse cell chromosome unpairing defect seen in condensin II mutants (*SMC4*<sup>k00819/+</sup>; *Cap-H2*<sup>z30019/+</sup>) is suppressed by three independent CK1 $\alpha$  heterozygous mutations (Fig. 5 and S5 Fig.). Furthermore, CK1 $\alpha$ -RNAi depletion or mutations increases chromatin bound Cap-H2 protein levels (Figs. 6 and 7). This was determined by immunofluorescence of endogenous Cap-H2 protein on polytene chromosomes as well as by sub-cellular fractionation of chromatin bound proteins from Cap-H2-EGFP expressing cells in culture. It is important to emphasize that Cap-H2 and other condensin II gene loss-of-function mutations do have oogenesis phenotypes that are completely suppressed by decreasing the dosage of CK1 $\alpha$  by half (Fig. 5 and S5 Fig.). Together, these findings demonstrate CK1 $\alpha$  as a novel regulator of interphase condensin II levels and activity.

CK1 $\alpha$  is a highly conserved serine/threonine kinase involved in Wnt signaling pathways, DNA repair, cell cycle progression, and mRNA metabolism [35,47,48]. Identification of CK1 $\alpha$  furthers our understanding of the mechanisms by which condensin II is regulated. The chromodomain protein Mrg15 is involved in the loading of Cap-H2, while the E3 Ubiquitin ligase, SCF<sup>Slimb</sup> ubiquitylates Cap-H2, removing it from chromatin and targeting it for proteasomal degradation [20,21]. Phosphorylation is known to be a prerequisite for Slimb recognition of its target proteins [29,49]. CK1 $\alpha$  has been shown to require other kinases that prime its recognition site. For example, CK1 $\alpha$  can phosphorylate the second S/T in the S/T-X-X-S/T motif but only when the S/T in the first position is already phosphorylated by a different kinase [33,50]. Interestingly, the C-terminal end of *Drosophila* Cap-H2, TPSDADSGISSMGSSLASTARLK, contains three S-X-X-S sites, where the underlined serines denote potential priming sites and bold serines indicate potential CK1 $\alpha$  phosphorylation sites (Fig. 7C). However, our efforts to test a direct interaction between CK1 $\alpha$  and Cap-H2 were unsuccessful, as we were unable to produce kinase-active CK1 $\alpha$  to determine whether CK1 $\alpha$  can phosphorylate recombinant Cap-H2 in vitro. Because depletion of CK1 $\alpha$  results in stabilization of Cap-H2 protein and increased condensin II activity (Figs. 6 and 7), we speculate that Cap-H2 itself is targeted by CK1 $\alpha$  but likely requires an additional kinase to prime Cap-H2 phosphorylation, as previously shown for other substrates like Armadillo/ $\beta$ -Catenin [33,50]. This hypothesis is further supported by the observation that the Cap-H2-Slimb interaction persists and that Cap-H2 is still ubiquitinated when CK1 $\alpha$  is depleted (Fig. 7F-G and S6 Fig.). It can be speculated that the initial steps of Cap-H2 degradation involve an additional regulator, perhaps a kinase priming Cap-H2 at specific residues, permitting Slimb interaction and ubiquitination of Cap-H2 at specific sites. However, the final step for Cap-H2 targeting for degradation and removal from chromatin may be mediated by CK1 $\alpha$ . Alternatively, it is possible that CK1 $\alpha$  is indirectly regulating Cap-H2, perhaps through an intermediate. CK1 $\alpha$  could be phosphorylating a regulator of Cap-H2 which determines Cap-H2 protein levels. For example, it is possible that although Slimb binding to Cap-H2 is independent of CK1 $\alpha$ , this kinase may phosphorylate some other protein or Slimb itself before the Cap-H2 protein can be fully degraded. Clearly how Slimb and CK1 $\alpha$  regulate Cap-H2 levels is more complex than previously appreciated. A recent study has shown that Armadillo/ $\beta$ -Catenin is protected from degradation by the Armless protein binding to and inhibiting Ter95, a component of the SCF<sup>Slimb</sup> E3-ligase [51]. This raises the possibility that Cap-H2 may similarly be protected from proteolysis, and Slimb-bound Cap-H2 molecules may require CK1 $\alpha$  to eliminate this protective function. While we have not been able to show a direct interaction between CK1 $\alpha$  and Cap-H2, it is clear from our experiments in cultured cells

and in *Drosophila* tissues that CK1 $\alpha$  limits Cap-H2 protein levels, thereby attenuating interphase condensin II activity.

Having multiple regulators of Cap-H2 allows for precise modulation of condensin II activity. We have previously shown that both Cap-H2 and Slimb are chromatin bound [20]. Whether CK1 $\alpha$  is also bound to chromatin is unknown. CK1 $\alpha$  associates with centrosomes in Chinese hamster ovary cells and CK1 $\alpha$  enters the nucleus after DNA damage induction in *Drosophila* embryos [35,52]. If CK1 $\alpha$  interaction with Cap-H2 precedes and is required for Slimb mediated Cap-H2 turnover, having a two-step requirement for Cap-H2 degradation would allow for more precise control over the spatial regulation of condensin II activity. We speculate that at chromatin regions where both Slimb and Cap-H2 are localized, condensin II activity can remain high while Cap-H2 remains dephosphorylated within the Slimb recognition site (Fig. 8). However, condensin II activity can be reduced quickly by localizing CK1 $\alpha$  to these specific regions and/or by regulated nuclear import of CK1 $\alpha$  [35], resulting in destruction of Cap-H2 protein. This speculative model of Cap-H2 removal from chromatin is attractive in that it would allow for a “switch-like” change in condensin activity that is responsive to developmental cues and environmental stressors. Furthermore, by differential distribution of Cap-H2 loading factors like Mrg15 [21] and inhibitors like Slimb [18,20] this model would allow for precise changes in chromosome morphology at the local chromatin level, possibly giving rise to local regions of high and low compaction that may define structures such as topologically associated domains (TADs).

It should be noted that there are four predicted *Drosophila* Cap-H2 splice isoforms. One of these isoforms, Cap-H2-RD, lacks a region of 64 amino acids in the C-terminus, present in the other three isoforms. This raises the possibility that Cap-H2-RD may be resistant to Slimb ubiquitination. We speculate that this isoform could provide areas of constitutive condensin II activity, where the chromatin is unpaired and/or providing local regions of high compaction. In *Drosophila* it is thought that the genome exhibits region-specific levels of homolog pairing, for example heterochromatin and euchromatin exhibit different somatic pairing properties [18,38,53]. Having different Cap-H2 isoforms and differential localization of Cap-H2 regulators bound to specific regions of chromatin could provide the necessary landscape to enable differences in regional pairing and compaction state, while regulators such as Slimb and CK1 $\alpha$  add plasticity to compaction states by modulating chromatin bound Cap-H2 levels.

Condensin II modulation of interphase chromatin compaction has also been shown to affect accessibility of other chromatin proteins. It was observed in Cap-H2 mutant mice, that loss of Cap-H2 resulted in disruption of T-cell differentiation [54,55]. Interestingly, chromatin condensation is involved in mouse T-cell differentiation. In response to cytokine signaling, naïve T-cell chromatin must decondense in order to allow for STAT5 transcription factor binding. Furthermore, this decondensation is dependent on the inactivation of condensin II [27]. Clearly, limiting interphase condensin II activity is important in this context, and it remains to be determined what mechanism is acting to repress condensin II function during mammalian T cell activation. It is tempting to speculate that cytokine signaling could trigger the activation of a condensin II antagonist, leading to the decrease in condensin II activity. This would lead to decondensation of chromatin allowing STAT5 access to DNA. Our findings in the *Drosophila* model suggest that similar interphase condensin II functions may be at play, and CK1 $\alpha$  along with Slimb are critical regulators of this condensin II activity. However, at present it is not known if mammalian condensin II activity is regulated by Slimb or CK1 $\alpha$ , and it should be noted that mouse and human Cap-H2 do not have clear Slimb binding consensus sequences. It will be of great value to identify additional kinases that may collaborate with CK1 $\alpha$  and Slimb to negatively regulate *Drosophila* condensin II activity, and to further elucidate the biological significance of this interphase condensin II function in *Drosophila* and other species.

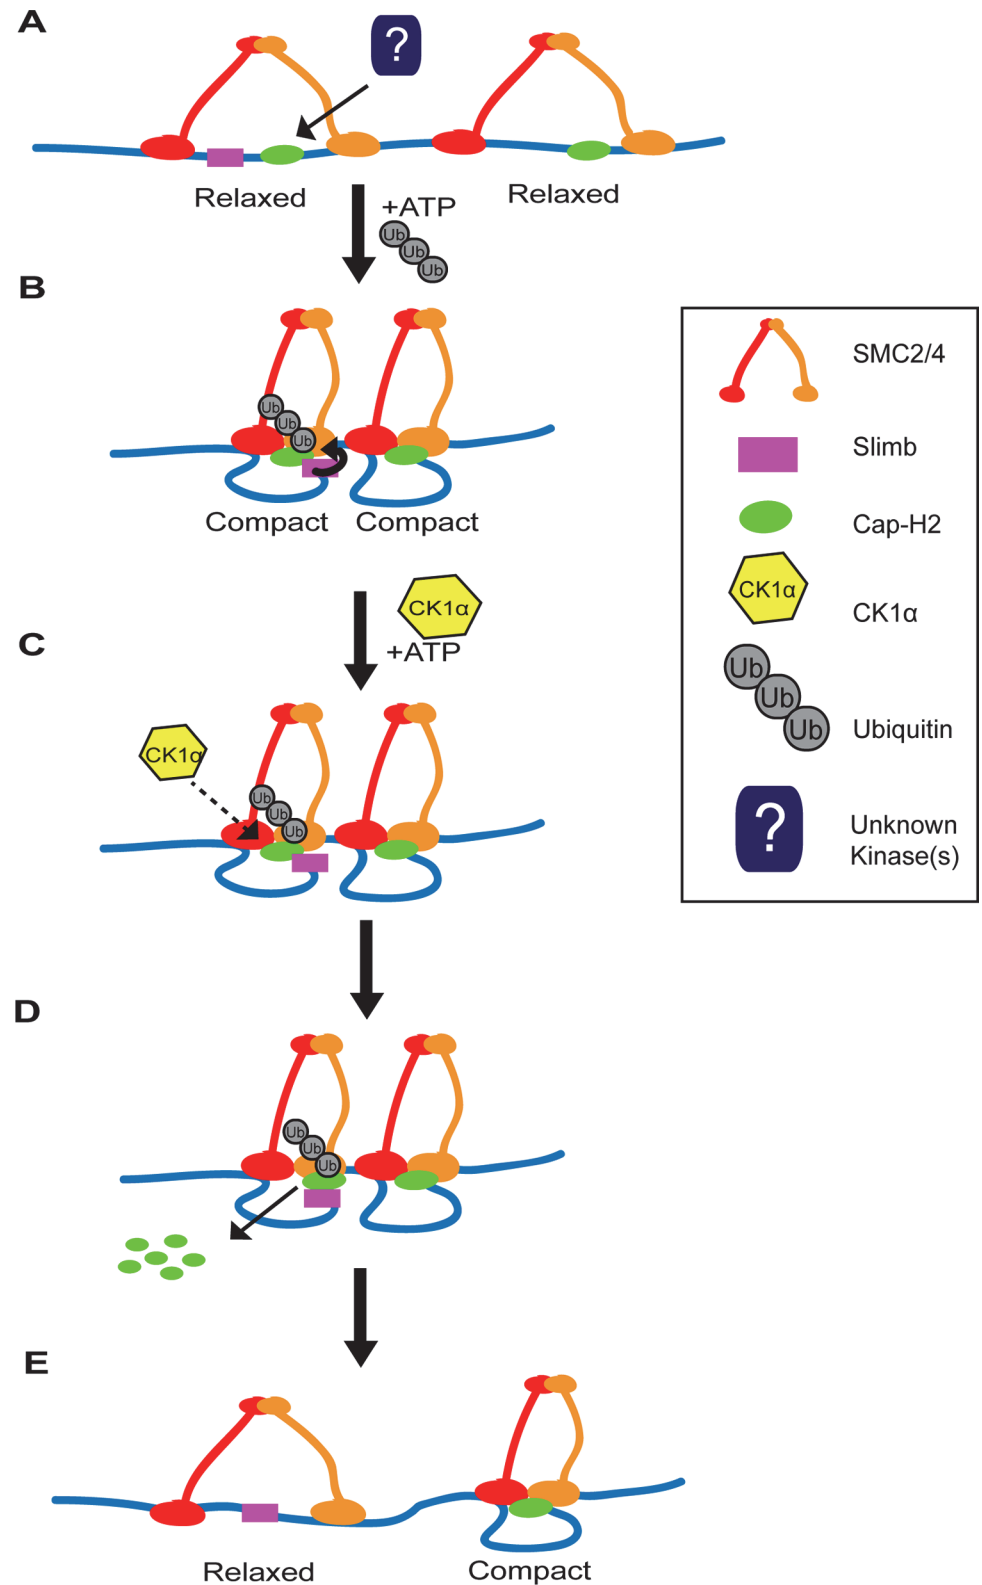

**Fig 8. Two-step model of Cap-H2 eviction from chromatin.** (A) SMC dimers (red and orange) are associated with DNA (blue line) in the “open” conformation, resulting in “relaxed” chromatin. There may be regions where Cap-H2 (green oval) is bound with or without Slimb (magenta square) nearby. (B) ATP binding to SMC dimers promotes the “closing” of the SMC subunits, resulting in the “compaction” of chromatin. Cap-

H2 binding to SMC dimers traps a closed SMC2/4 dimer and inhibits ATP hydrolysis. Inhibition of ATP hydrolysis by Cap-H2 is thought to maintain SMC dimers in the “closed” conformation and promotes axial chromosome compaction. (C) CK1 $\alpha$  negatively regulates Cap-H2. This may occur by directly phosphorylating Cap-H2 or indirectly by CK1 $\alpha$  targeting an unknown regulator of Cap-H2. (D) CK1 $\alpha$  promotes Cap-H2 removal from chromatin and degradation. Note that Slimb interaction with Cap-H2 is not likely to be dependent on CK1 $\alpha$  activity. In chromatin regions where Slimb and CK1 $\alpha$  are absent (condensin II complex on the right), Cap-H2 could remain on the chromatin, as it avoids Slimb and CK1 $\alpha$  mediated degradation. (E) Cap-H2 removal from chromatin results in the opening of the SMC dimer, resulting in the “relaxation” of chromatin (left side), whereas on chromatin where Slimb is absent, Cap-H2 remains chromatin bound and the chromatin remains axially compact (right side).

doi:10.1371/journal.pgen.1005014.g008

## Materials and Methods

### Cell culture and double-stranded RNAi

*Drosophila* cell culture, in vitro dsRNA synthesis, and RNAi treatments were performed as previously described [56]. S2 and Kc cells were cultured in Sf900-II media (Life Technologies) supplemented with 1X Antibiotic-Antimycotic (Life Technologies). S2R+ cells were cultured in Schneider’s media (Life Technologies) supplemented with 1X Penicillin Streptomycin (Corning Cellgro) and 10% Fetal Bovine Serum (Thermo Scientific; Hyclone). RNAi treatments were performed in 6-well tissue culture plates, with 10 $\mu$ g of dsRNA in 1mL media administered to confluent (50–90%) wells. Wells were replenished with fresh 1mL of media and 10 $\mu$ g dsRNA every other day for 4–7 days. dsRNA was made using gene specific primer sequences listed in [S1 Table](#). Control (SK) dsRNA was made by amplifying off PCR product from a non-GFP sequence of the pEGFP-N1 vector (Takara Bio Inc.). PCR products were then used as template for dsRNA production using T7 RiboMAX Express Large Scale RNA Production System kit (Promega, # P1320). dsRNA concentration was then calculated using gel electrophoresis and densitometry analysis (NIH ImageJ).

Cell viability experiments were performed with Kc cells treated with dsRNA and cultured as described above with modifications. 750,000 cells per well were plated in triplicates into a 24-well tissue culture plate (Falcon) with 300 $\mu$ L of media and 3 $\mu$ g of dsRNA per well and treated every other day for 4–6 days. At days 4 and 6, aliquots of cells were taken for Propidium Iodide and DAPI staining for cell viability analysis. Approximately one third (100 $\mu$ L) of each well was taken and 150 $\mu$ L new media was added containing Propidium Iodide (1ng/ $\mu$ L) and DAPI (2 $\mu$ g/mL) and incubated at 25 $^{\circ}$ C for 30 minutes. Mixture was then spun down and resuspended in 10 $\mu$ L new media and plated onto microscope slides and coverslips to image. Image fields were obtained and used for counting with nuclei co-staining for both Propidium Iodide and DAPI being counted as a “dead” cell.

### Constructs and transfections

Construct production and transfection were performed as described previously [20]. cDNA encoding Cap-H2-EGFP or *Drosophila* ubiquitin (3x-Flag-Ubiquitin) were subcloned into the inducible metallothionein promoter pMT vector, as previously described [20]. Transient transfections were performed using the Nucleofector II (Lonza) according to manufacturer’s instructions. Transiently transfected cells ([Fig. 7B,F,G](#)) were induced 24 hours post transfection. Stable S2 cell lines ([Fig. 7A](#)) were selected by co-transfection with pCoHygro (Life Technologies) plasmid and treated for 3–4 weeks with Hygromycin B (Life Technologies). Expression of all constructs was induced by addition of 1mM CuSO $_4$  to the media and processed for downstream experiments 24 hours later. Transiently transfected Kc cells in [Fig. 7B](#) were cotransfected with pMT-eGFP and pMT-Cap-H2-eGFP in order to confirm equal

transfection efficiency between treatments. Stable Kc cell lines under inducible metallothionein promoter (Fig. 7D) were provided by the Wu lab (Harvard Medical School).

### CK1 $\alpha$ drug inhibition

D4476, chemical Casein Kinase I inhibitor (EMD Millipore Calbiochem) was resuspended in DMSO to 50 $\mu$ M stock dilutions. D4476 was then diluted into cell culture media at 80 $\mu$ M and added to cells (60–95% confluent) in 6-well tissue culture plates. Cells were treated for 8 hours and prepped for immunoblotting or plated onto Concanavalin-A (Sigma-Aldrich) coated coverslips for immunostaining, as previously described. Control treated cells were treated with same volume of DMSO under same conditions as drug treatment.

### Immunofluorescence

Cultured cells were immunostained as previously described [56]. Cells were plated onto Concanavalin-A (Sigma-Aldrich) coated cover slips, allowed to adhere onto coverslips for 20min then fixed with 10% formaldehyde (Ted Pella, INC) in PBS at room temperature. Cells were then washed with PBS and then 0.1% PBS/Triton to permeabilize. Cells were then blocked with Block Solution (5% normal goat serum (Sigma-Aldrich), 0.1% PBS/Triton, and 1mM Sodium Azide (Sigma-Aldrich)) for 1 hour at room temperature prior to immunostaining. Primary antibodies were diluted in block solution and coverslips were incubated with primary antibody for 1 hour at room temperature. Primary antibody concentrations used were as follows: rabbit anti-CID at 1:400 [20], mouse anti-Lamin (Dm<sub>0</sub>) ADL 84.12 at 1:200 (*Drosophila* Hybridoma Bank, University of Iowa), rabbit anti-phosphorylated-Histone-H3 at 1:500 (Upstate; EMD Millipore), and rabbit anti-Cap-H2 at 1:50 [16]. Cells were then washed with 0.1% PBS/Triton three times for 5 minutes each at RT. Secondary antibodies (conjugated to Alexa 488 (Life Technologies), Cy-2, or Cy-3 (Jackson ImmunoResearch Laboratories) were diluted in block solution and coverslips were incubated with secondary for 2 hours at room temperature. Secondary antibody concentrations used were as follows: Alexa 488 at 1:500, Cy-2 at 1:500, and Cy-3 at 1:500. Coverslips were then washed with 0.1% PBS/Triton three times for 5 minutes each at RT. Coverslips were then washed with PBS for 5 minutes at RT. 4',6-Diamidino-2-Phenylindole, Dihydrochloride (DAPI) (Life Technologies) was used at a final concentration of 1 $\mu$ g/mL in PBS for 10 minutes to stain DNA. Coverslips were then washed two times in PBS for 5 minutes. Coverslips were then mounted onto microscope slides and were mounted using Vectashield (Vector Labs) and sealed with nail polish and stored at -20 degrees.

Whole mount ovaries were immunostained as previously described [21]. Tissues were dissected in PBS and fixed in 4% formaldehyde/PBS for 10 minutes. Tissues were then rinsed with 0.1% PBS/Triton and blocked with block solution (same as used for cell staining) for 30 minutes. Tissues were incubated with primary antibodies (same as above) overnight at 4° rotating on rotator. Tissue was then washed in 0.1% PBS/Triton three times for 5 minutes while rotating at room temperature. Tissues were then blocked two times for 15 minutes while rotating at room temperature. Secondary antibodies (same as above) were incubated with samples for 2 hours. Tissues were rinsed with 0.1% PBS/Triton then PBS and counterstained with DAPI for 10 minutes. Tissues were then mounted onto slides with Vectashield and sealed using nail polish.

Salivary gland squashes were performed as previously described [57] with modifications. Salivary glands were dissected in 0.7% NaCl and were placed onto Repel silane (GE Healthcare) coated cover slips and fixed in 3.7% formaldehyde in 45% acetic acid for 2.5 minutes. Coverslips with glands were then inverted onto a glass poly-L-lysine (Sigma) coated microscope slide and squashed with an orthopedic hammer until nuclei burst. Glands from different genotypes

were squashed onto different sections of the same slide to serve as an internal control. The location of the different glands was noted on the slide, as previously described [43]. Slides/coverslips were then dipped into liquid nitrogen and coverslips were removed using a razor blade. Squashed chromosomes were then washed once in PBS at RT. Antibodies (same as above) were diluted in PBS, 0.1% NP40 (Sigma-Aldrich), and 1% non-fat milk (Carnation) and added to slide and covered with cover slip. Primary antibody incubations were performed in humid chamber at 4 degrees overnight. Slides were then washed in 0.1% NP40/PBS for 5 minutes and secondary antibodies (same as above) were added and covered with cover slip for 2 hours in humid chamber at RT. Slides were then washed three times in PBS and counterstained with DAPI (1 $\mu$ g/mL) for 25 seconds and washed for 5 minutes in PBS. Slides were mounted with coverslip and Vectashield and sealed with nail polish.

### Fluorescent in situ hybridization (FISH)

Whole mount salivary gland and ovary FISH was performed by dissecting tissues into PBS. Tissues were then fixed in 100 mM sodium cacodylate, 100 mM sucrose, 40 mM sodium acetate, 10 mM EGTA, and 3.7% formaldehyde for 4 min at RT. Tissues were then rinsed in 2X SSCT (0.3 M NaCl, 0.03 M sodium citrate, pH 7.0, and 0.1% Triton) and treated with 2 $\mu$ g/mL Ribonuclease A (Sigma-Aldrich) for 1 hour. 10 minute stepwise washes were performed in 20%, 40%, and 50% formamide (Sigma-Aldrich) in 2X SSCT. Tissues were pre-hybridized in 50% formamide/2X SSCT for 2 hours in 37° water bath. 1–2  $\mu$ L of each probe in hybridization solution (Dextran sulfate (Sigma-Aldrich), NaCl, sodium citrate, formamide, H<sub>2</sub>O) to a total volume of 40  $\mu$ L was added to 0.2 mL PCR tube with tissues. Hybridization was performed using a thermal cycler, 91° for 2 minutes to denature and 37° overnight for hybridization. Tissues were then washed in 50% formamide in 2X SSCT three times for 30 minutes. 10 minute stepwise washes were performed in 40% then 20% formamide in 2X SSCT. Tissues were then washed three times in 2X SSCT for 10 minutes, 10 minutes in 0.1% PBS/Triton, and then counterstained with DAPI (1  $\mu$ g/mL) in PBS for 10 minutes at RT. Two 10 minute PBS washes were performed and tissues were mounted in Vectashield and sealed with nail polish.

Cultured cell FISH was performed as previously described [20]. Cells were plated onto Con-A coated coverslips in a well of a 6-well tissue culture plate for 20 minutes and allowed to adhere to coverslips at room temperature. Coverslips were then washed with 1X PBS and fixed in 10% Formaldehyde/PBS for 10 minutes at RT. Coverslips were then washed once with PBS and permeabilized in 0.1% PBS/Triton for 10 minutes. Cells were then washed in CSK buffer (10mM HEPES, 100mM NaCl, 3mM MgCl<sub>2</sub>, 300 mM Sucrose, and Phenylmethanesulfonyl fluoride (PMSF)) for 10 minutes and Ribonuclease A (100 $\mu$ g/mL) for 1 hour at RT. Cells were then washed with 0.1N HCl for 5 minutes and taken through ethanol series for 5 minutes each (70%, 90%, then 100%). One 2X SSCT wash was performed and cells were pre-hybed in 50% formamide/2X SSCT at 37 degrees for 2 hours. FISH probe (1–2  $\mu$ L each probe) was then added to hybridization solution (total 25  $\mu$ L) and this mixture was denatured at 95° for 2 minutes and snap cooled in ice bath. Probe mixture was then added onto microscope slide and coverslips were inverted onto the microscope slide. Coverslips were then sealed with rubber cement and slide/coverslip was denatured at 93° on a heat block for 3 minutes. Slides were then placed in humid chamber and hybridized overnight at 37°. After hybridization was complete, coverslips were detached from slides by immersing in 50% formamide/2X SSCT with shaking for 10 minutes. Coverslips were then placed into 6-well tissue culture plates and washed three times for 30 minutes at 42° (all heterochromatin probe post washes performed at 37°). Ten minute washes at 42° were then performed with 40% then 20% formamide in 2X SSCT. Three 2X SSCT washes were performed for 5 minutes each at RT on shaker. Cells were then





Salivary gland polytene squash intensity analysis was performed by obtaining multiple fields of chromosomes from different genotypes on the same slide. Experimental genotypes (CK1 $\alpha$  mutants and RNAi) were squashed on the same slide as their respective controls (*Oregon R* for mutants and *43B>Gal4* for RNAi) such that they could be imaged using identical settings for downstream analyses [43]. Multiple fields (5–6) of chromosomes were imaged for each genotype in both DAPI and Cap-H2 channels. Images used for fluorescence intensity measurements were captured such that pixel saturation was limited for all channels. Images were then analyzed using ImageJ as follows: First, all image sets were split into separate channels (DAPI and Cap-H2) and converted to gray scale. Secondly, the mean/average intensity value for the entire DAPI image was measured. Background fluorescence was subtracted by measuring a “blank” square from the same DAPI image and subtracting mean background intensity of this square from the mean grey value of the entire image ( $\text{DAPI}_{\text{mean intensity}} - \text{Background}_{\text{mean intensity}} = \text{DAPI}_{\text{corrected}}$ ). This produced a background subtracted intensity value for the DAPI image ( $\text{DAPI}_{\text{corrected}}$ ). Next, the same process was performed for the image using the Cap-H2 image in grey scale ( $\text{Cap-H2}_{\text{correct}}$ ). Then, the ratio of Cap-H2 to DAPI was calculated ( $\text{Cap-H2}_{\text{corrected}} \div \text{DAPI}_{\text{corrected}} = \text{Chromatin Cap-H2}$ ) for each set of images. These values were then averaged for all the image fields obtained for each genotype. Changes in chromatin bound Cap-H2 levels were calculated by comparing the experimental genotype average ratio to its respective control average ratio ( $\text{Chromatin Cap-H2}_{\text{CK1}\alpha \text{ Mutants}} \div \text{Chromatin Cap-H2}_{\text{Controls}} = \text{Change in chromatin bound Cap-H2}$ ). Values in Fig. 6D represent fold-changes in Cap-H2 as compared to their respective controls. Statistical analyses were performed in Microsoft Excel using a two-tailed student t-test assuming unequal variance.

Mitotic indexes/percentage of cells staining positive for phosphorylated-histone-H3 were assessed by using CellProfiler Cell Image Analysis Software (<http://www.cellprofiler.org>; Broad Institute). Micrographs were captured on a Nikon Eclipse E800 Epifluorescent upright microscope using a Nikon Plan Fluor 20X 0.5 NA objective with Olympus DP controller software.

## Immunoblotting

For Fig. 7A–B, cell extracts were obtained by pelleting and lysing cells in PBT with protease inhibitor (Roche). Protein concentration was calculated by performing the Bradford protein assay (Bio-Rad Laboratories). Laemmli sample buffer was then added to extracts and boiled for 5 minutes prior to loading onto denaturing gel. For Fig. 7, antibodies used are as follows: mouse anti-GFP (JL8 Takara Bio Inc.), guinea pig anti-Slimb (Brownlee et al, 2011), mouse anti-armadillo (N2 7A1; Drosophila Hybridoma Bank), mouse anti-alpha-tubulin (Dm1; Sigma-Aldrich), mouse anti-lamin Dm0 (ADL84.12; Drosophila Hybridoma Bank), and rabbit anti-Hisone-H3 (06–755; EMD Millipore).

## Immunoprecipitations

Immunoprecipitations were performed as previously described [20]. GFP-binding protein (GBP; [60]) was fused to the Fc domain of human IgG (pIg-Tail; R&D Systems), tagged with His6 in pET28a (EMD Millipore), expressed in *E. coli*, and purified on Talon resin (Takara Bio Inc.) according to manufacturer’s instructions. GBP was bound to Protein A-coupled Sepharose, cross-linked to the resin using dimethyl pimelimidate, and rocked for 1 h at 22°C; the coupling reaction was then quenched in 0.2 M ethanolamine, pH 8.0, and rocked for 2 h at 22°C. Antibody or GBP-coated beads were washed three times with 1.5 ml of cell lysis buffer (CLB; 100 mM Tris, pH 7.2, 125 mM NaCl, 1 mM DTT, 0.1% Triton X-100, and 1X Protease Inhibitor (Roche). S2, Kc, and Kc stable line expressing inducible Cap-H2-EGFP cells were treated with RNAi for 6 days, as described above in “Cell culture and double-stranded RNAi.” On day

4, cells were transfected with inducible GFP tag only, Cap-H2-EGFP, and/or 3x-FLAG-Ubiquitin. On day 5, transfected cells were induced with 1 mM CuSO<sub>4</sub>. After 24 h, transfected cells were lysed in CLB, clarified by centrifugation, and then diluted to 2–5 mg/ml in CLB. Antibody-coated beads were mixed with lysate in 1 mL total volume for 90 min at 4°C, washed three times with CLB, and then boiled in Laemmli sample buffer.

## Cellular fractionations

Kc cells stably expressing an inducible Cap-H2-EGFP (provided by the Wu lab) were treated with RNAi as described above but in T75 flasks. Cells were induced 24h prior to harvesting. On day 6, cells were harvested and then fractionated into whole cell lysate (WCL), cytoplasmic (S2), nuclear-soluble (S3), and chromatin (P3) fractions as described previously [20,61]. In brief,  $\sim 10^7$  cells were collected, washed with cold PBS, and resuspended at  $4 \times 10^7$  cells/ml in buffer A: 10 mM Hepes, pH 7.9, 10 mM KCl, 1.5 mM MgCl<sub>2</sub>, 0.34 M sucrose, 10% glycerol, 1 mM DTT, and protease inhibitor cocktail (Roche). Cells were lysed by the addition of 0.1% Triton X-100 and then incubated on ice for 8 min (fraction WCL). Nuclei were collected by centrifugation (5 min, 1,300 g, 4°C), the initial supernatant was further cleared by high-speed centrifugation (5 min, 20,000 g, 4°C), and the final supernatant was collected (fraction S2). The pelleted nuclei were washed once in buffer A, and nuclear membranes were lysed for 30 min in 3 mM EDTA, 0.2 mM EGTA, 1 mM DTT, and protease inhibitor cocktail (Roche) (buffer B). The insoluble chromatin (fraction P3) and soluble (fraction S3) fractions were separated by centrifugation (5 min, 1,700 g, 4°C). The insoluble chromatin pellet was washed once with buffer B and resuspended in SDS loading buffer. The protein concentration of each fraction was determined by a Bradford's assay (Bio-Rad Laboratories), and 20  $\mu$ g of protein from each fraction was immunoblotted.

## Flow cytometry

Flow cytometry and DNA content analysis on RNAi treated S2 cells was performed as previously described [62]. RNAi treated S2 cells ( $10^6$ ) were pelleted at 1,000 g for 5 min, resuspended in 0.5 ml PBS, and vortexed while intermittently adding 0.5 ml of cold 100% ethanol. Fixed cells were incubated on ice for 20 min, pelleted (1,000 g for 5 min), and resuspended in a 0.5 ml propidium iodide (PI)-RNase solution (50  $\mu$ g/ml PI + 100  $\mu$ g/ml RNase Type1 I-A [QIAGEN] in PBS). After 20 min, cells were passed through a 12  $\times$  75-mm flow cytometry tube (Falcon; Thermo Fisher Scientific). Cytometric analysis was performed in the Arizona Cancer Center/Arizona Research Laboratories Division of Biotechnology Cytometry Core Facility using a FACScan flow cytometer (BD) equipped with an air-cooled 15-mW argon ion laser tuned to 488 nm. List mode data files consisting of 10,000 cells gated on forward scatter versus side scatter were acquired and analyzed using CellQuest Pro software (BD).

## Drosophila strains

Fly crosses were performed on yeast/molasses/cornmeal media and kept at 25°. *CK1 $\alpha$ <sup>G0492</sup>* (Bloomington Stock Center # 12303), *CK1 $\alpha$ <sup>EP1555</sup>* (Bloomington Stock Center # 17009), *CK1 $\alpha$ <sup>8B12</sup>* (gift from Yashi Ahmed) [40], *CK1 $\alpha$ <sup>RNAi</sup> VALIUM10* (Harvard TRiP line: JF7192, Bloomington Stock Center # 25786), *SMC4<sup>k00819</sup>* (Bloomington Stock Center # 10831) [63], *Cap-H2<sup>Z3-0019</sup>* [16], *43B>Gal4* salivary gland specific driver (gift from Patrick O'Farrel) [44], *Slimb<sup>3A1</sup>*, *Slimb<sup>UU11</sup>* alleles were previously described [20].

## Supporting Information

**S1 Fig. CK1 $\alpha$  depletion in Kc cells does not affect cell viability.** (A) Micrographs of RNAi treated Kc cells stained with propidium iodide (green) to mark dead cells and counterstained with DAPI (DNA, red). Dead cells are marked by presence of both DAPI and propidium iodide staining (yellow). (B) Histogram showing percentage of dead cells marked by propidium iodide staining in Kc cells after RNAi depletion of indicated protein. CK1 $\alpha$  depletion does not significantly affect cell viability, while SMC2 depletion significantly increases percentage of dead cells after 4 days of RNAi treatment. n = 600–700 cells per treatment. \* = p-value < 0.0005 (calculated by using students' t-test in MS Excel). Error bars indicate SEM. (A) Images are from single z-slices.

(TIF)

**S2 Fig. CK1 $\alpha$  RNAi depletion causes abnormal dispersal of centromeric protein CID, chromosome compaction, and chromosome unpairing in *Drosophila* cultured cells.** (A) Micrographs of RNAi treated S2 cells immunostained for centromeric protein (CID) and counterstained for DNA (DAPI, blue). CK1 $\alpha$  depletion induces abnormal centromere dispersal, which is suppressed by double RNAi of CK1 $\alpha$  + Cap-H2. (B) Histogram showing average number of CID spots per S2 nucleus after RNAi depletion of the indicated protein (n = 100–142 cells per treatment). CK1 $\alpha$  depletion results in a significant increase in number of CID spots, which is suppressed with codepletion of Cap-H2. Statistical comparisons are between RNAi treatments and control, unless denoted by horizontal line between bars. (C) Histogram showing average number of CID spots per nucleus after RNAi depletion of the indicated protein in Kc cells. Suppression of increase in CID spots in CK1 $\alpha$ -RNAi is suppressed by CK1 $\alpha$  + Cap-H2 RNAi but not CK1 $\alpha$  + Barren RNAi (n = 115–180 cells per treatment). Statistical comparisons are between RNAi treatments and control, unless denoted by horizontal line between bars. (D) Micrographs of RNAi treated Kc cells stained with FISH probes specific to two locations on the X Chromosome: X1 (green) and X2 (Red) and counterstained for DNA (DAPI, blue). CK1 $\alpha$  RNAi results in increased chromosome compaction and unpairing of chromosomes (quantification in Fig. 3G,H). (E) Histogram (modified from Fig. 3G) showing the average number of FISH spots per nucleus in RNAi depleted Kc cells (n = 50–110 cells per treatment). CK1 $\alpha$  + Barren RNAi does not significantly suppress the increase in the number of FISH spots seen in CK1 $\alpha$  RNAi. Statistical comparisons are between RNAi treatments and CK1 $\alpha$  RNAi. (F) Micrographs of RNAi treated Kc cells stained with FISH probes specific to heterochromatic regions on Chromosome 2R (green), 3R (red), and counterstained for DNA (DAPI, blue). CK1 $\alpha$  RNAi results in unpairing of heterochromatic loci (quantification in Fig. 3M). N.S. = No significance. \* = p-value < 8.5x10<sup>-3</sup> (calculated by using students' t-test in MS Excel). Error bars indicate SEM. (A,D,F) Maximum projection image of multiple z-slices. Scale bar, 5 $\mu$ m.

(TIF)

**S3 Fig. CK1 $\alpha$  depletion in Kc cells does not increase mitotic index or cell ploidy.** (A) Micrographs of RNAi treated Kc cells immunostained for Phosphorylated Histone H3 (green), a mitotic marker, and counterstained for DNA (DAPI, magenta). CK1 $\alpha$  depletion reduces the number of cells undergoing mitosis. (B) Histogram showing average mitotic indexes of Kc cells after RNAi treatments. CK1 $\alpha$  depletion significantly reduces the amount of cells undergoing mitosis. This reduction is suppressed by co-depletion of CK1 $\alpha$  and Cap-H2; (n = 3900–7100 cells per treatment). p-value = \* = 0.046, \*\* = 0.0014, \*\*\* = 7.9x10<sup>-6</sup> (calculated by using students' t-test in MS excel). Statistical comparisons are between RNAi treatments and control, unless denoted by horizontal line between bars. Error bars indicate SEM. (C) Histograms of DNA fluorescence intensity (x axis) and cell number (y axis) from flow cytometry on RNAi

treated S2 cells. Increased proportion of cells in G1-phase in CK1 $\alpha$  depleted cells. (A) Images are from single z-slice. Scale bar, 50 $\mu$ m.

(TIF)

**S4 Fig. CK1 $\alpha$  and Slimb double heterozygous mutants do not increase unpairing of salivary gland nuclei.** (A) Micrographs of salivary gland nuclei from control wild-type larvae (*Oregon-R*), Slimb heterozygotes (*Slimb<sup>UU11</sup>/+* and *Slimb<sup>3A1</sup>/+*), CK1 $\alpha$  heterozygote (*CK1 $\alpha$ <sup>8B12</sup>/+*), and Slimb/CK1 $\alpha$  double heterozygotes (*CK1 $\alpha$ <sup>8B12</sup>/+; Slimb<sup>UU11</sup>/+* and *CK1 $\alpha$ <sup>8B12</sup>/+; Slimb<sup>3A1</sup>/+*) were stained with a FISH probe specific to a region of Chromosome 2L (green) and counterstained with DAPI (DNA, blue). Chromosomes are highly paired in control nuclei with single and double heterozygous mutations in CK1 $\alpha$  and/or Slimb having non-significant effects on chromosome pairing status. (B) Histogram showing average number of FISH spots per nucleus in salivary glands from (A); (n = 26–41 nuclei per genotype). Statistics calculated by using students' t-test in excel. Error bars indicate SEM. (A) Maximum projection image of multiple z-slices. Scale, 10 $\mu$ m.

(TIF)

**S5 Fig. Condensin mutant nurse cell polytene defect is suppressed by CK1 $\alpha$ <sup>G0492</sup>/+ mutation in vivo.** (A–D) Micrographs of stage 10 nurse cells from control (triple balancer) (A), CK1 $\alpha$ <sup>G0492</sup>/+ heterozygous mutant (B), condensin II loss of function mutant (*SMC4<sup>k00819</sup>/+*; *Cap-H2<sup>z3-0019</sup>/+*) (C), and CK1 $\alpha$ <sup>G0492</sup>/+ heterozygote in condensin II loss of function background (*CK1 $\alpha$ <sup>G0492</sup>/+; SMC4<sup>k00819</sup>/+; Cap-H2<sup>z3-0019</sup>/+*) (D) were stained with a FISH probe specific to Chromosome 2L (green) and counterstained with DAPI (DNA, blue). (E) Histogram showing the average number of FISH spots for each probe in stage 10 nurse cells. n = 23–31 nurse cells per genotype. Error bars indicate SEM. p-value = \* < 0.0001 (calculated by using students' t-test in excel). (A–D) Maximum projection image of multiple z-slices. Scale, 20 $\mu$ m.

(TIF)

**S6 Fig. CK1 $\alpha$ , PKA, and GSK3 $\beta$  depletion does not affect Slimb and Cap-H2 interaction in S2 cells.** Immunoprecipitations and immunoblots from RNAi treated S2 cells, transiently transfected with inducible EGFP as a negative control or inducible Cap-H2-EGFP. Anti-Cap-H2-EGFP immunoprecipitates Slimb in both control and CK1 $\alpha$  depleted cells expressing Cap-H2-EGFP. GFP tag only transfected cells did not immunoprecipitate Slimb. Anti-armadillo was used to verify CK1 $\alpha$  depletion and anti-Lamin-Dm0 was used as protein loading control.

(TIF)

**S1 Table. Primer sequences to generate dsRNAs used in the study.** All primers begin with the T7 promoter sequence: 5'-TAATACGACTCACTATAGGG-3', followed by the gene specific primer sequence. Control dsRNA was generated using a plasmid encoding pEGFP-N1 as template. NA = Not applicable.

(TIF)

## Acknowledgments

We would like to thank Claudio Sunkel for CK1 $\alpha$  antibodies, Yashi Ahmed for CK1alpha mutant flies, Eric Joyce and C-Ting Wu for Kc Cap-H2-eGFP stable lines, Heather Wallace for critical reading of the manuscript and all members of the Bosco, Ahmed and Wu labs for helpful discussions and suggestions. Also, we are grateful to the Bloomington Drosophila Stock Center and FlyBase for essential resources.

## Author Contributions

Conceived and designed the experiments: HQN JN DWB JEK GCR GB. Performed the experiments: HQN JN DWB JEK GCR. Analyzed the data: HQN JN DWB JEK GCR. Contributed reagents/materials/analysis tools: HQN JN DWB JEK GCR GB. Wrote the paper: HQN GCR GB.

## References

1. Cremer T, Cremer M (2010) Chromosome territories. *Cold Spring Harb Perspect Biol* 2: a003889. doi: [10.1101/cshperspect.a003889](https://doi.org/10.1101/cshperspect.a003889) PMID: [20300217](https://pubmed.ncbi.nlm.nih.gov/20300217/)
2. Dekker J, Marti-Renom MA, Mirny LA (2013) Exploring the three-dimensional organization of genomes: interpreting chromatin interaction data. *Nature reviews Genetics* 14: 390–403. doi: [10.1038/nrg3454](https://doi.org/10.1038/nrg3454) PMID: [23657480](https://pubmed.ncbi.nlm.nih.gov/23657480/)
3. Gibcus JH, Dekker J (2013) The hierarchy of the 3D genome. *Molecular cell* 49: 773–782. doi: [10.1016/j.molcel.2013.02.011](https://doi.org/10.1016/j.molcel.2013.02.011) PMID: [23473598](https://pubmed.ncbi.nlm.nih.gov/23473598/)
4. Ferrai C, de Castro IJ, Lavitas L, Chotalia M, Pombo A (2010) Gene positioning. *Cold Spring Harbor perspectives in biology* 2: a000588. doi: [10.1101/cshperspect.a000588](https://doi.org/10.1101/cshperspect.a000588) PMID: [20484389](https://pubmed.ncbi.nlm.nih.gov/20484389/)
5. Aparicio OM (2013) Location, location, location: it's all in the timing for replication origins. *Genes & development* 27: 117–128. doi: [10.1016/j.lungcan.2015.01.009](https://doi.org/10.1016/j.lungcan.2015.01.009) PMID: [25638801](https://pubmed.ncbi.nlm.nih.gov/25638801/)
6. Agmon N, Liefshitz B, Zimmer C, Fabre E, Kupiec M (2013) Effect of nuclear architecture on the efficiency of double-strand break repair. *Nature cell biology* 15: 694–699. doi: [10.1038/ncb2745](https://doi.org/10.1038/ncb2745) PMID: [23644470](https://pubmed.ncbi.nlm.nih.gov/23644470/)
7. Hirano T, Kobayashi R, Hirano M (1997) Condensins, chromosome condensation protein complexes containing XCAP-C, XCAP-E and a Xenopus Homolog of the Drosophila Barren Protein. *Cell* 89: 511–521. PMID: [9160743](https://pubmed.ncbi.nlm.nih.gov/9160743/)
8. Hirano T (2005) Condensins: organizing and segregating the genome. *Curr Biol* 15: R265–275. PMID: [15823530](https://pubmed.ncbi.nlm.nih.gov/15823530/)
9. Graumann PL, Knust T (2009) Dynamics of the bacterial SMC complex and SMC-like proteins involved in DNA repair. *Chromosome Res* 17: 265–275. doi: [10.1007/s10577-008-9014-x](https://doi.org/10.1007/s10577-008-9014-x) PMID: [19308706](https://pubmed.ncbi.nlm.nih.gov/19308706/)
10. Wallace HA, Bosco G (2013) Condensins and 3D Organization of the Interphase Nucleus. *Current genetic medicine reports* 1: 219–229. PMID: [24563825](https://pubmed.ncbi.nlm.nih.gov/24563825/)
11. Hirano T (2012) Condensins: universal organizers of chromosomes with diverse functions. *Genes & development* 26: 1659–1678. doi: [10.1016/j.lungcan.2015.01.009](https://doi.org/10.1016/j.lungcan.2015.01.009) PMID: [25638801](https://pubmed.ncbi.nlm.nih.gov/25638801/)
12. Hirota T, Gerlich D, Koch B, Ellenberg J, Peters JM (2004) Distinct functions of condensin I and II in mitotic chromosome assembly. *J Cell Sci* 117: 6435–6445. PMID: [15572404](https://pubmed.ncbi.nlm.nih.gov/15572404/)
13. Ono T, Fang Y, Spector DL, Hirano T (2004) Spatial and temporal regulation of Condensins I and II in mitotic chromosome assembly in human cells. *Molecular biology of the cell* 15: 3296–3308. PMID: [15146063](https://pubmed.ncbi.nlm.nih.gov/15146063/)
14. Gerlich D, Hirota T, Koch B, Peters JM, Ellenberg J (2006) Condensin I stabilizes chromosomes mechanically through a dynamic interaction in live cells. *Current biology: CB* 16: 333–344. PMID: [16488867](https://pubmed.ncbi.nlm.nih.gov/16488867/)
15. Shintomi K, Hirano T (2011) The relative ratio of condensin I to II determines chromosome shapes. *Genes & development* 25: 1464–1469. doi: [10.1016/j.lungcan.2015.01.009](https://doi.org/10.1016/j.lungcan.2015.01.009) PMID: [25638801](https://pubmed.ncbi.nlm.nih.gov/25638801/)
16. Hartl TA, Smith HF, Bosco G (2008) Chromosome alignment and transvection are antagonized by condensin II. *Science* 322: 1384–1387. doi: [10.1126/science.1164216](https://doi.org/10.1126/science.1164216) PMID: [19039137](https://pubmed.ncbi.nlm.nih.gov/19039137/)
17. Hartl TA, Sweeney SJ, Knepler PJ, Bosco G (2008) Condensin II Resolves Chromosomal Associations to Enable Anaphase I Segregation in Drosophila Male Meiosis. *PLoS Genet* 4: e1000228. doi: [10.1371/journal.pgen.1000228](https://doi.org/10.1371/journal.pgen.1000228) PMID: [18927632](https://pubmed.ncbi.nlm.nih.gov/18927632/)
18. Joyce EF, Williams BR, Xie T, Wu CT (2012) Identification of genes that promote or antagonize somatic homolog pairing using a high-throughput FISH-based screen. *PLoS genetics* 8: e1002667. doi: [10.1371/journal.pgen.1002667](https://doi.org/10.1371/journal.pgen.1002667) PMID: [22589731](https://pubmed.ncbi.nlm.nih.gov/22589731/)
19. Bateman JR, Larschan E, D'Souza R, Marshall LS, Dempsey KE, et al. (2012) A genome-wide screen identifies genes that affect somatic homolog pairing in Drosophila. *G3* 2: 731–740. doi: [10.1534/g3.112.002840](https://doi.org/10.1534/g3.112.002840) PMID: [22870396](https://pubmed.ncbi.nlm.nih.gov/22870396/)
20. Buster DW, Daniel SG, Nguyen HQ, Windler SL, Skwarek LC, et al. (2013) SCFSlmb ubiquitin ligase suppresses condensin II-mediated nuclear reorganization by degrading Cap-H2. *The Journal of cell biology* 201: 49–63. doi: [10.1083/jcb.201207183](https://doi.org/10.1083/jcb.201207183) PMID: [23530065](https://pubmed.ncbi.nlm.nih.gov/23530065/)

21. Smith HF, Roberts MA, Nguyen HQ, Peterson M, Hartl TA, et al. (2013) Maintenance of interphase chromosome compaction and homolog pairing in *Drosophila* is regulated by the condensin Cap-H2 and its partner Mrg15. *Genetics* in press.
22. Bauer CR, Hartl TA, Bosco G (2012) Condensin II Promotes the Formation of Chromosome Territories by Inducing Axial Compaction of Polyploid Interphase Chromosomes. *PLoS genetics* 8: e1002873. doi: [10.1371/journal.pgen.1002873](https://doi.org/10.1371/journal.pgen.1002873) PMID: [22956908](https://pubmed.ncbi.nlm.nih.gov/22956908/)
23. Longworth MS, Walker JA, Anderssen E, Moon NS, Gladden A, et al. (2012) A shared role for RBF1 and dCAP-D3 in the regulation of transcription with consequences for innate immunity. *PLoS genetics* 8: e1002618. doi: [10.1371/journal.pgen.1002618](https://doi.org/10.1371/journal.pgen.1002618) PMID: [22496667](https://pubmed.ncbi.nlm.nih.gov/22496667/)
24. Schuster AT, Sarvepalli K, Murphy EA, Longworth MS (2013) Condensin II subunit dCAP-D3 restricts retrotransposon mobilization in *Drosophila* somatic cells. *PLoS genetics* 9: e1003879. doi: [10.1371/journal.pgen.1003879](https://doi.org/10.1371/journal.pgen.1003879) PMID: [24204294](https://pubmed.ncbi.nlm.nih.gov/24204294/)
25. Ono T, Yamashita D, Hirano T (2013) Condensin II initiates sister chromatid resolution during S phase. *The Journal of cell biology* 200: 429–441. doi: [10.1083/jcb.201208008](https://doi.org/10.1083/jcb.201208008) PMID: [23401001](https://pubmed.ncbi.nlm.nih.gov/23401001/)
26. Manning AL, Yazinski SA, Nicolay B, Bryll A, Zou L, et al. (2014) Suppression of Genome Instability in pRB-Deficient Cells by Enhancement of Chromosome Cohesion. *Molecular cell* 53: 993–1004. doi: [10.1016/j.molcel.2014.01.032](https://doi.org/10.1016/j.molcel.2014.01.032) PMID: [24613344](https://pubmed.ncbi.nlm.nih.gov/24613344/)
27. Rawlings JS, Gatzka M, Thomas PG, Ihle JN (2011) Chromatin condensation via the condensin II complex is required for peripheral T-cell quiescence. *The EMBO journal* 30: 263–276. doi: [10.1038/emboj.2010.314](https://doi.org/10.1038/emboj.2010.314) PMID: [21169989](https://pubmed.ncbi.nlm.nih.gov/21169989/)
28. Floyd SR, Pacold ME, Huang Q, Clarke SM, Lam FC, et al. (2013) The bromodomain protein Brd4 insulates chromatin from DNA damage signalling. *Nature*.
29. Smelkinson MG, Kalderon D (2006) Processing of the *Drosophila* hedgehog signaling effector Ci-155 to the repressor Ci-75 is mediated by direct binding to the SCF component Slimb. *Current biology: CB* 16: 110–116. PMID: [16386907](https://pubmed.ncbi.nlm.nih.gov/16386907/)
30. Peifer M, Pai LM, Casey M (1994) Phosphorylation of the *Drosophila* adherens junction protein Armadillo: roles for wingless signal and zeste-white 3 kinase. *Developmental biology* 166: 543–556. PMID: [7529201](https://pubmed.ncbi.nlm.nih.gov/7529201/)
31. Chen Y, Gallaher N, Goodman RH, Smolik SM (1998) Protein kinase A directly regulates the activity and proteolysis of cubitus interruptus. *Proceedings of the National Academy of Sciences of the United States of America* 95: 2349–2354. PMID: [9482888](https://pubmed.ncbi.nlm.nih.gov/9482888/)
32. Jiang J, Struhl G (1998) Regulation of the Hedgehog and Wingless signalling pathways by the F-box/WD40-repeat protein Slimb. *Nature* 391: 493–496. PMID: [9461217](https://pubmed.ncbi.nlm.nih.gov/9461217/)
33. Yanagawa S, Matsuda Y, Lee JS, Matsubayashi H, Sese S, et al. (2002) Casein kinase I phosphorylates the Armadillo protein and induces its degradation in *Drosophila*. *The EMBO journal* 21: 1733–1742. PMID: [11927557](https://pubmed.ncbi.nlm.nih.gov/11927557/)
34. Liu C, Li Y, Semenov M, Han C, Baeg GH, et al. (2002) Control of beta-catenin phosphorylation/degradation by a dual-kinase mechanism. *Cell* 108: 837–847. PMID: [11955436](https://pubmed.ncbi.nlm.nih.gov/11955436/)
35. Santos JA, Logarinho E, Tapia C, Allende CC, Allende JE, et al. (1996) The casein kinase 1 alpha gene of *Drosophila melanogaster* is developmentally regulated and the kinase activity of the protein induced by DNA damage. *Journal of cell science* 109 (Pt 7): 1847–1856. PMID: [8832407](https://pubmed.ncbi.nlm.nih.gov/8832407/)
36. Rena G, Bain J, Elliott M, Cohen P (2004) D4476, a cell-permeant inhibitor of CK1, suppresses the site-specific phosphorylation and nuclear exclusion of FOXO1a. *EMBO reports* 5: 60–65. PMID: [14710188](https://pubmed.ncbi.nlm.nih.gov/14710188/)
37. Mennella V, Tan DY, Buster DW, Asenjo AB, Rath U, et al. (2009) Motor domain phosphorylation and regulation of the *Drosophila* kinesin 13, KLP10A. *The Journal of cell biology* 186: 481–490. doi: [10.1083/jcb.200902113](https://doi.org/10.1083/jcb.200902113) PMID: [19687256](https://pubmed.ncbi.nlm.nih.gov/19687256/)
38. Williams BR, Bateman JR, Novikov ND, Wu CT (2007) Disruption of topoisomerase II perturbs pairing in *Drosophila* cell culture. *Genetics* 177: 31–46. PMID: [17890361](https://pubmed.ncbi.nlm.nih.gov/17890361/)
39. Dej KJ, Spradling AC (1999) The endocycle controls nurse cell polytene chromosome structure during *Drosophila* oogenesis. *Development* 126: 293–303. PMID: [9847243](https://pubmed.ncbi.nlm.nih.gov/9847243/)
40. Legent K, Steinhauer J, Richard M, Treisman JE (2012) A screen for X-linked mutations affecting *Drosophila* photoreceptor differentiation identifies Casein kinase 1alpha as an essential negative regulator of wingless signaling. *Genetics* 190: 601–616. doi: [10.1534/genetics.111.133827](https://doi.org/10.1534/genetics.111.133827) PMID: [22095083](https://pubmed.ncbi.nlm.nih.gov/22095083/)
41. Bellen HJ, Levis RW, Liao G, He Y, Carlson JW, et al. (2004) The BDGP gene disruption project: single transposon insertions associated with 40% of *Drosophila* genes. *Genetics* 167: 761–781. PMID: [15238527](https://pubmed.ncbi.nlm.nih.gov/15238527/)
42. Peter A, Schottler P, Werner M, Beinert N, Dowe G, et al. (2002) Mapping and identification of essential gene functions on the X chromosome of *Drosophila*. *EMBO reports* 3: 34–38. PMID: [11751581](https://pubmed.ncbi.nlm.nih.gov/11751581/)

43. Pal-Bhadra M, Leibovitch BA, Gandhi SG, Rao M, Bhadra U, et al. (2004) Heterochromatic silencing and HP1 localization in *Drosophila* are dependent on the RNAi machinery. *Science* 303: 669–672. PMID: [14752161](#)
44. Follette PJ, Duronio RJ, O'Farrell PH (1998) Fluctuations in cyclin E levels are required for multiple rounds of endocycle S phase in *Drosophila*. *Curr Biol* 8: 235–238. PMID: [9501987](#)
45. Jia J, Zhang L, Zhang Q, Tong C, Wang B, et al. (2005) Phosphorylation by double-time/CKIepsilon and CKIalpha targets cubitus interruptus for Slimb/beta-TRCP-mediated proteolytic processing. *Developmental cell* 9: 819–830. PMID: [16326393](#)
46. Honaker Y, Piwnicka-Worms H (2010) Casein kinase 1 functions as both penultimate and ultimate kinase in regulating Cdc25A destruction. *Oncogene* 29: 3324–3334. doi: [10.1038/onc.2010.96](#) PMID: [20348946](#)
47. Peters JM, McKay RM, McKay JP, Graff JM (1999) Casein kinase I transduces Wnt signals. *Nature* 401: 345–350. PMID: [10517632](#)
48. Gross SD, Loijens JC, Anderson RA (1999) The casein kinase Ialpha isoform is both physically positioned and functionally competent to regulate multiple events of mRNA metabolism. *Journal of cell science* 112 (Pt 16): 2647–2656. PMID: [10413673](#)
49. Deshaies RJ (1999) SCF and Cullin/Ring H2-based ubiquitin ligases. *Annual review of cell and developmental biology* 15: 435–467. PMID: [10611969](#)
50. Flotow H, Graves PR, Wang AQ, Fiol CJ, Roeske RW, et al. (1990) Phosphate groups as substrate determinants for casein kinase I action. *The Journal of biological chemistry* 265: 14264–14269. PMID: [2117608](#)
51. Reim G, Hruzova M, Goetze S, Basler K (2014) Protection of Armadillo/beta-Catenin by Armless, a Novel Positive Regulator of Wingless Signaling. *PLoS biology* 12: e1001988. doi: [10.1371/journal.pbio.1001988](#) PMID: [25369031](#)
52. Brockman JL, Gross SD, Sussman MR, Anderson RA (1992) Cell cycle-dependent localization of casein kinase I to mitotic spindles. *Proceedings of the National Academy of Sciences of the United States of America* 89: 9454–9458. PMID: [1409656](#)
53. Fung JC, Marshall WF, Dernburg A, Agard DA, Sedat JW (1998) Homologous chromosome pairing in *Drosophila melanogaster* proceeds through multiple independent initiations. *The Journal of cell biology* 141: 5–20. PMID: [9531544](#)
54. Gosling KM, Makaroff LE, Theodoratos A, Kim YH, Whittle B, et al. (2007) A mutation in a chromosome condensin II subunit, kleisin beta, specifically disrupts T cell development. *Proc Natl Acad Sci U S A* 104: 12445–12450. PMID: [17640884](#)
55. Gosling KM, Goodnow CC, Verma NK, Fahrer AM (2008) Defective T-cell function leading to reduced antibody production in a kleisin-beta mutant mouse. *Immunology* 125: 208–217. doi: [10.1111/j.1365-2567.2008.02831.x](#) PMID: [18397266](#)
56. Rogers GC, Rusan NM, Roberts DM, Peifer M, Rogers SL (2009) The SCF Slimb ubiquitin ligase regulates Plk4/Sak levels to block centriole reduplication. *The Journal of cell biology* 184: 225–239. doi: [10.1083/jcb.200808049](#) PMID: [19171756](#)
57. Wallace HA, Plata MP, Kang HJ, Ross M, Labrador M (2010) Chromatin insulators specifically associate with different levels of higher-order chromatin organization in *Drosophila*. *Chromosoma* 119: 177–194. doi: [10.1007/s00412-009-0246-0](#) PMID: [20033198](#)
58. Chambeyron S, Bickmore WA (2004) Chromatin decondensation and nuclear reorganization of the HoxB locus upon induction of transcription. *Genes & development* 18: 1119–1130. doi: [10.1016/j.lungcan.2015.01.009](#) PMID: [25638801](#)
59. Lau AC, Nabeshima K, Csankovszki G (2014) The *C. elegans* dosage compensation complex mediates interphase X chromosome compaction. *Epigenetics & chromatin* 7: 31. doi: [10.1016/j.molp.2015.01.021](#) PMID: [25638564](#)
60. Rothbauer U, Zolghadr K, Muyldermans S, Schepers A, Cardoso MC, et al. (2008) A versatile nanotrap for biochemical and functional studies with fluorescent fusion proteins. *Molecular & cellular proteomics: MCP* 7: 282–289. doi: [10.1016/j.bios.2015.01.029](#) PMID: [25638814](#)
61. Wysocka J, Reilly PT, Herr W (2001) Loss of HCF-1-chromatin association precedes temperature-induced growth arrest of tsBN67 cells. *Molecular and cellular biology* 21: 3820–3829. PMID: [11340173](#)
62. Brownlee CW, Klebba JE, Buster DW, Rogers GC (2011) The Protein Phosphatase 2A regulatory subunit Twins stabilizes Plk4 to induce centriole amplification. *The Journal of cell biology* 195: 231–243. doi: [10.1083/jcb.201107086](#) PMID: [21987638](#)
63. Cobbe N, Savvidou E, Heck MM (2006) Diverse mitotic and interphase functions of condensins in *Drosophila*. *Genetics* 172: 991–1008. PMID: [16272408](#)
